# Supplementary material for: Mapping trends in woody cover throughout Namibian savanna with MODIS seasonal phenological metrics and field inventory data
Source: Copernicus journal article supplement (doi:10.5194/bg-2019-28), 2019-02-14
Supplement: Supplementary file [file bg-2019-28-AC2-supplement.zip]

# Mapping trends in woody cover throughout Namibian savanna with MODIS seasonal phenological metrics and field inventory data

Vladimir R. Wingate<sup>1</sup>, Nikolaus J. Kuhn<sup>1</sup>, Stuart R. Phinn<sup>2</sup>, Cornelis van der Waal<sup>3</sup>

<sup>1</sup>Physical Geography and Environmental Change, University of Basel, Basel, Switzerland

5 <sup>2</sup>Remote Sensing Research Centre, School of Earth and Environmental Sciences, The University of Queensland, St Lucia, Australia

<sup>3</sup>Agri-Ecological Services, PO Box 28, Omaruru, Namibia

10 *Correspondence to:* Vladimir R. Wingate ([Vladimir.wingate@unibas.ch](mailto:Vladimir.wingate@unibas.ch))

## 5

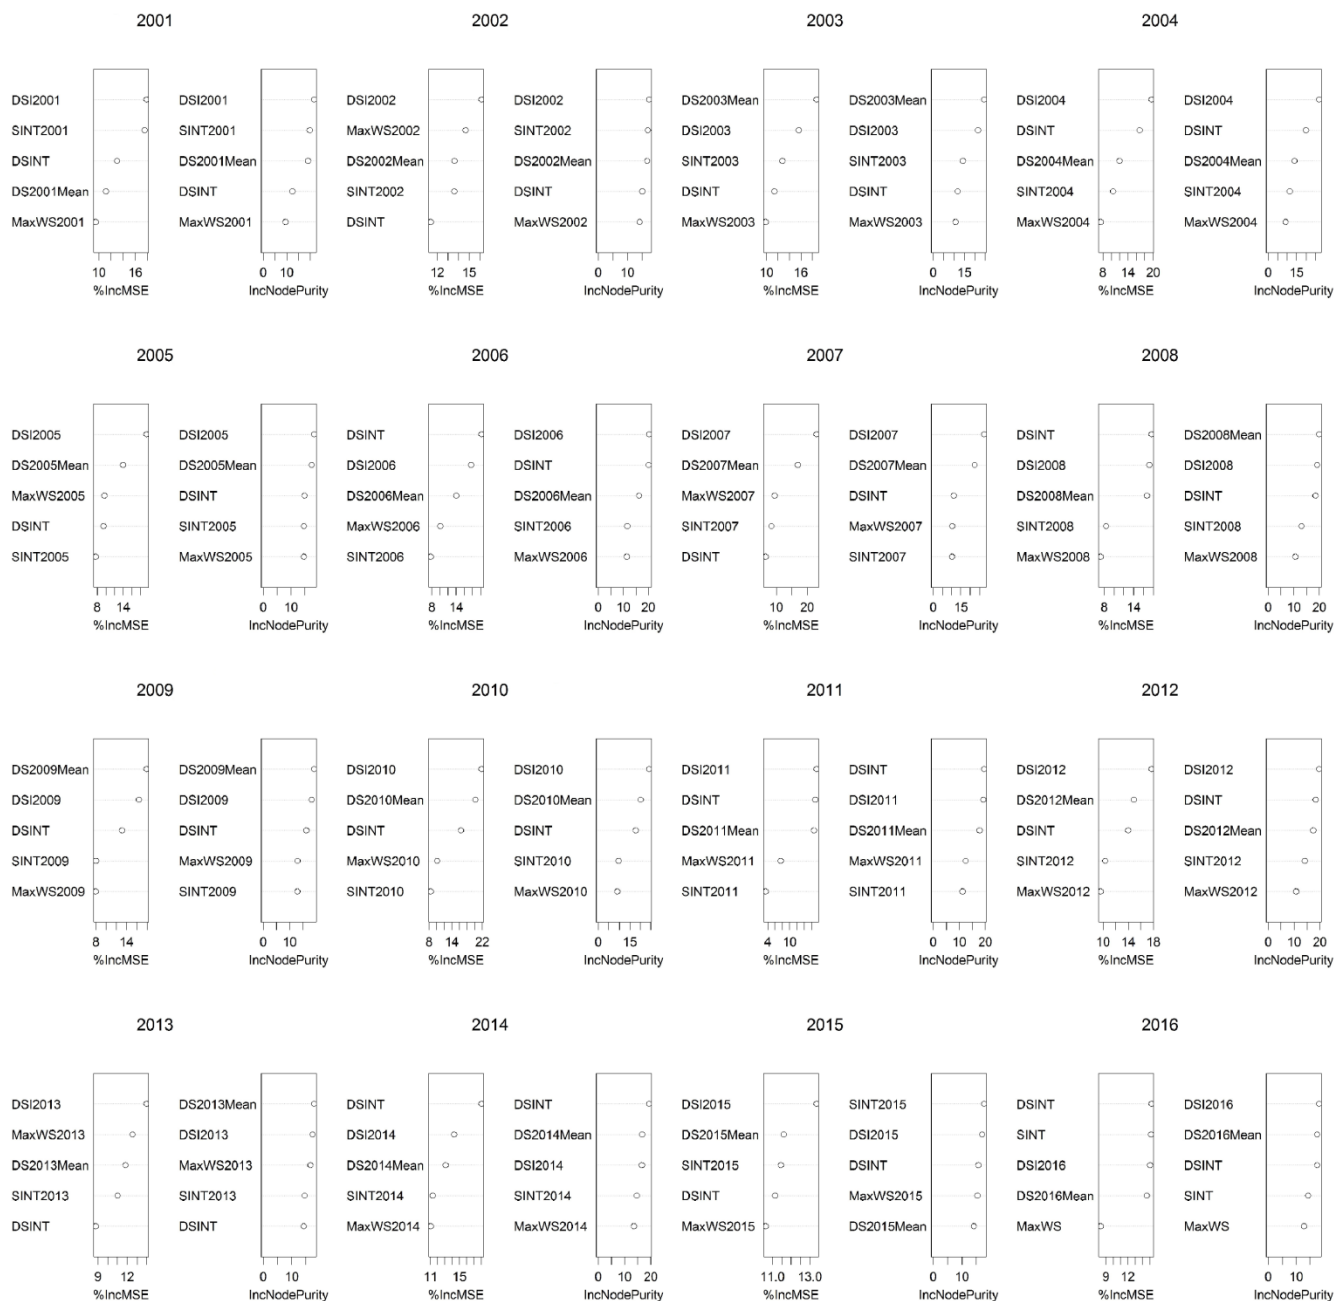

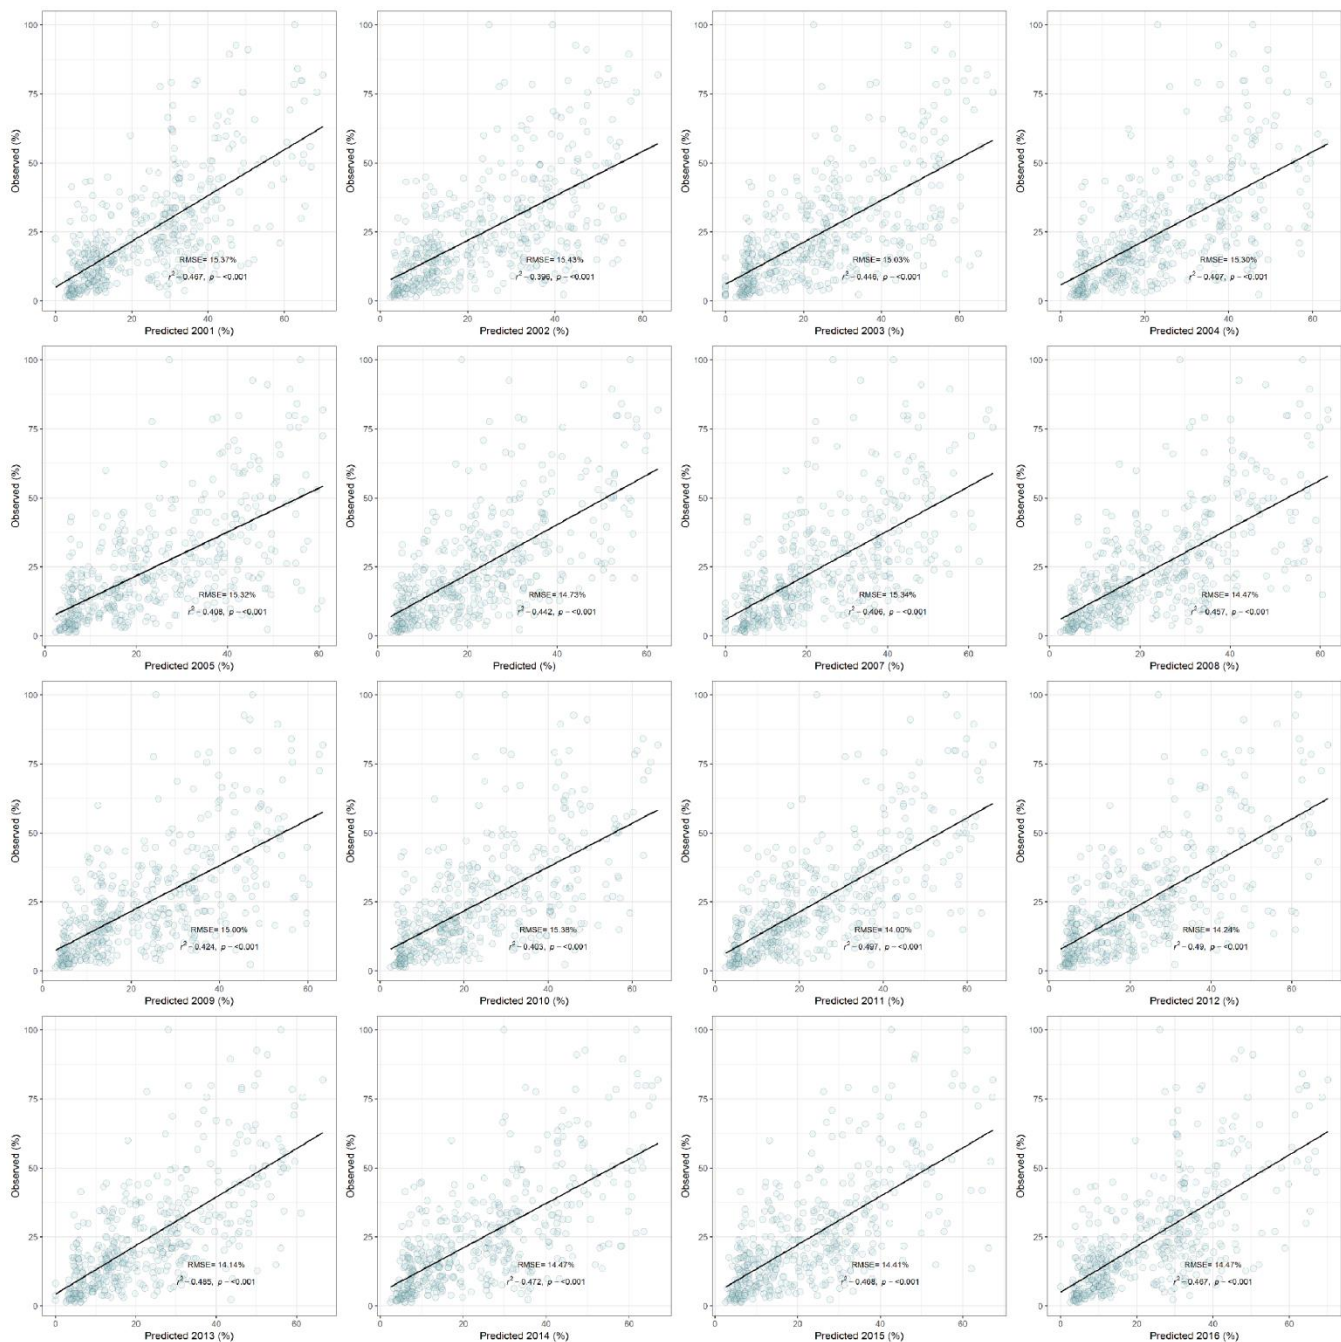

**Figure S2. Linear regression of observed and predicted values; between the 2001 and 2016 models, the  $R^2$  values ranged from 0.4 to 0.5, and the RMSE ranged from 14.14% to 15.43%.**

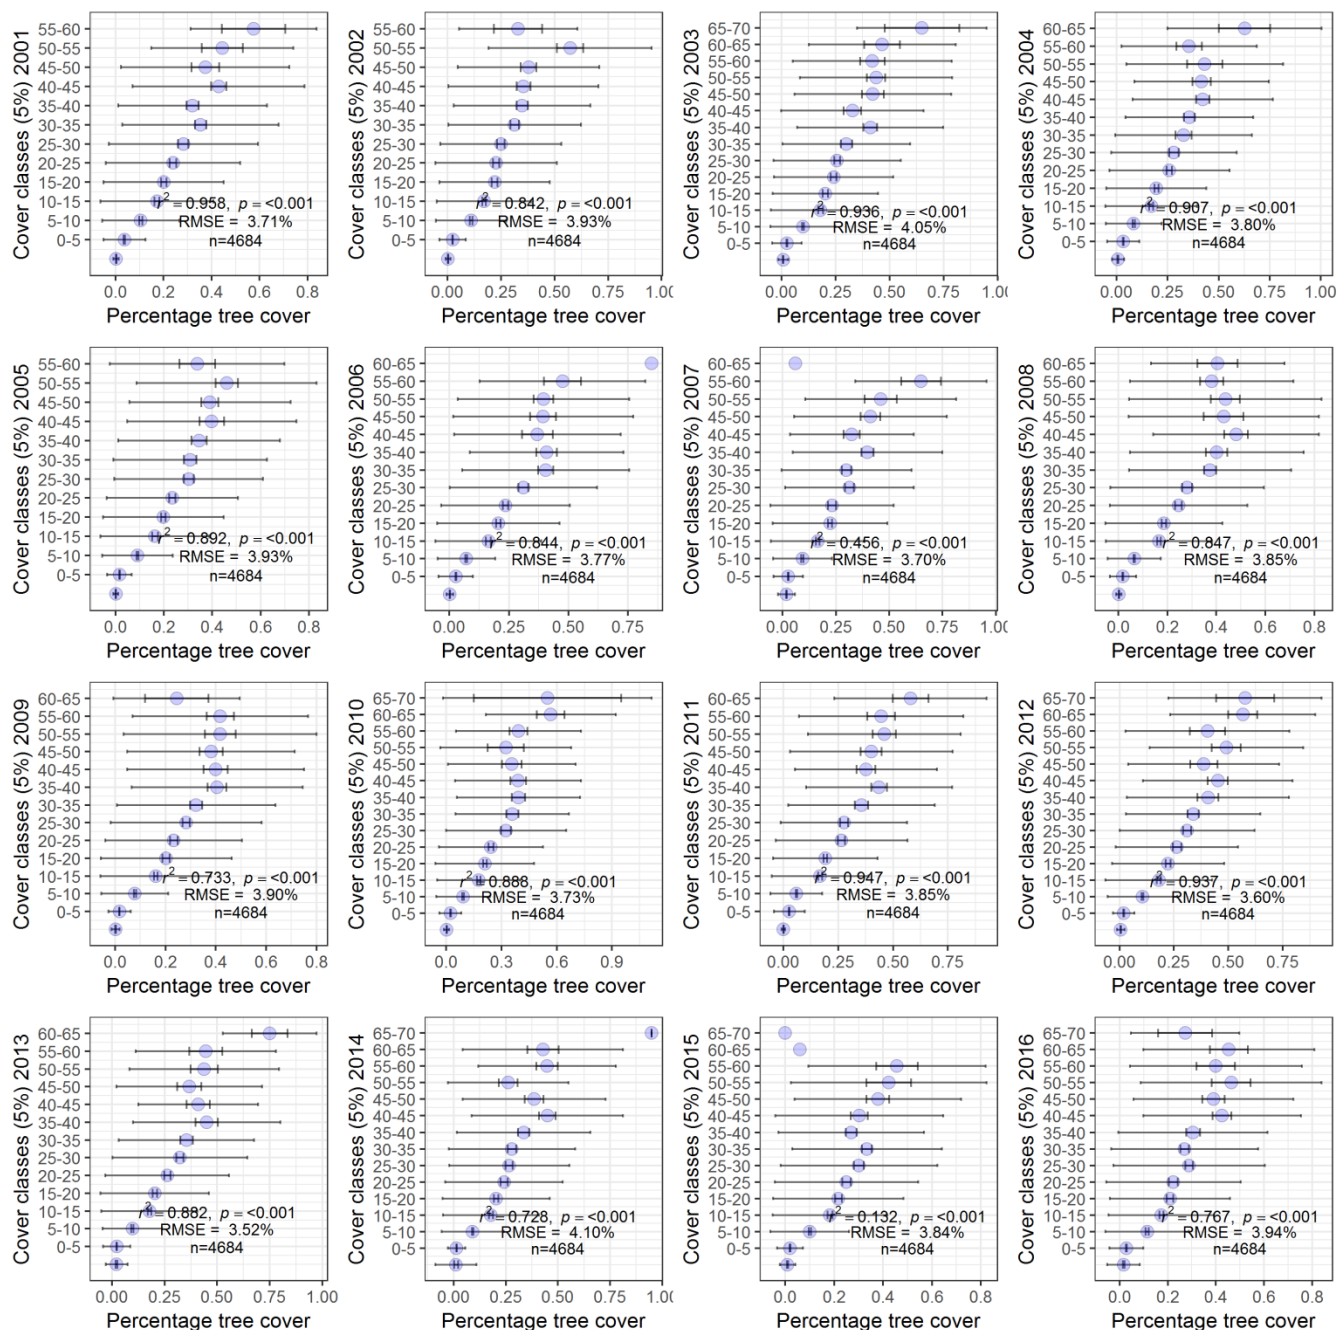

**Figure S3.** Between the 2001 and 2016 models, the  $R^2$  values ranged from 0.13 to 0.96, and the RMSE ranged from 3.52% to 4.10%. Low  $R^2$  values are the results of single outlier percentage tree cover (%) observation within cover classes. For example, for the 2006 model, only a single observed percentage woody cover (%) sample was identified for the 60-65 % cover class.



Coefficient of determination (%)

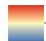

0 50 Kilometers

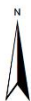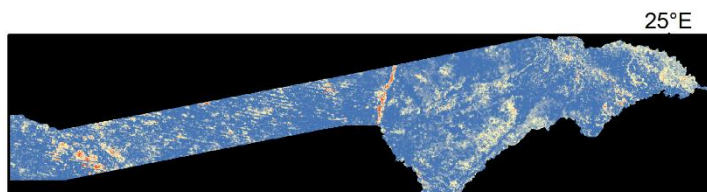

25°E

25°E

15°E

20°E

20°S

25°S

20°S

25°S

15°E

20°E

**Figure S4.  $R^2$  values resulting from a linear regression between mean annual precipitation anomalies (independent) and annual percentage woody cover anomalies (dependent).**
