# Supplementary material for: Mapping trends in woody cover throughout Namibian savanna with MODIS seasonal phenological metrics and field inventory data
Source: Copernicus journal article supplement (doi:10.5194/bg-2019-28), 2019-02-14
Supplement: Supplementary file [file bg-2019-28-AC2-supplement.zip]

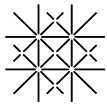

## Letter to the Editor

Dear Natascha Töpfer,

Thank you once again for the opportunity to submit a second round of major revisions of our paper “Mapping trends in woody cover throughout Namibian savanna with MODIS seasonal phenological metrics and field inventory data”, and we would especially like to thank you for your continued assistance in the revision and submission process. The authors would like to thank the reviewer, Anonymous Referee #2, who has provided very constructive comments, which we feel certainly contributed to increasing the quality of the manuscript.

Please find attached a “Interactive Comments 2” file, which provides a point-by-point response to Anonymous Referee #2 comments. We endeavoured to address each point raised, with the responses to the comments highlighted in green, and changes made in the revised manuscript highlighted in yellow.

With reference to the Major Points raised by Reviewer #2, the authors have now substantially altered the text and figures as per the reviews recommendations. In particular, sentences which describe how phenological metrics are defined and computed have now been made clearer, a description of the random forest models and how they were used has been updated, and the structure of the methods has been altered as proposed by the reviewer (please see attached “Interactive Comments 2” file for details).

I look forward to hearing from you and hope for a positive response in due course.

Best regards,

Vladimir Wingate

On behalf of Prof Nikolaus Kuhn, Prof Stuart Phinn, Dr Cornelis van der Waal

Yours sincerely,

Vladimir Wingate
