# Supplementary material for: Mapping trends in woody cover throughout Namibian savanna with MODIS seasonal phenological metrics and field inventory data
Source: Copernicus journal article supplement (doi:10.5194/bg-2019-28), 2019-02-14
Supplement: Supplementary file [file bg-2019-28-AC2-supplement.zip]

# Mapping trends in woody cover throughout Namibian savanna with MODIS seasonal phenological metrics and field inventory data

Vladimir R. Wingate<sup>1</sup>, Nikolaus J. Kuhn<sup>1</sup>, Stuart R. Phinn<sup>2</sup>, Cornelis van der Waal<sup>3</sup>

<sup>1</sup>Physical Geography and Environmental Change, University of Basel, Basel, Switzerland

5 <sup>2</sup>Remote Sensing Research Centre, School of Earth and Environmental Sciences, The University of Queensland, St Lucia, Australia

<sup>3</sup>Agri-Ecological Services, PO Box 28, Omaruru, Namibia

10 *Correspondence to:* Vladimir R. Wingate ([Vladimir.wingate@unibas.ch](mailto:Vladimir.wingate@unibas.ch))

**Abstract.** Woody vegetation is an integral component of savannas. Here, two main change processes alter woody vegetation, namely shrub encroachment and deforestation. Both impact a range of ecosystem services and functions across scales. Accurate estimates of change, including spatial extent, rate and drivers are lacking. This is primarily due to savanna  
15 vegetation comprising woody and herbaceous vegetation, each of which exhibit divergent phenological characteristics, and vary importantly in their response to climatic and environmental factors. This study uses phenological metrics derived from the MODIS MOD13Q1 NDVI time-series to model woody cover as a function of field measurements, and to map trends across Namibia. These metrics enhance the contrasting phenological characteristics of woody and herbaceous vegetation, and standardizes their annual response to climatic and environmental factors by integrating short term variation. Trends in  
20 woody cover are excellent indicators of shrub encroachment and deforestation. Trend significance was computed using the Mann-Kendall test, while change statistics, including the rate and spatial extent of change were derived using the Theil-Sen slope. Change was evaluated in relation to drivers including land-use, population, biomes and precipitation. **An overall decrease in woody cover was identified over the period from 2001-2016, with the most pronounced decreases found in urban and densely populated areas.** Decreases in woody cover were not homogenously distributed; losses predominated in tropical  
25 desert and dry forests, but gains were found across shrub lands.

## 1 Introduction

Savannas constitute one of the most extensive biomes, covering over a fifth of Earth's land surface and providing a livelihood for a substantial number of people (Scholes and Archer 1997; Sankaran et al. 2005). Savanna vegetation is characterized by the co-occurrence of trees, shrubs and herbaceous species with a distinguishing feature being their  
30 contrasting phenologies. The proportions of woody and herbaceous species vary widely, forming forests, grasslands and shrub lands (Archibald and Scholes 2007; Murphy and Bowman 2012; Frost 1996). Woody vegetation is an important component of savannas (Emmanuel N Chidumayo and Gumbo 2010; Sánchez- Azofeifa et al. 2005); it is essential not only at the local scale, where it provides resources for rural communities ranging from forage to timber, but also at the global scale, where it contributes key ecosystem services functions affecting biodiversity, carbon and water cycling, surface energy

balance and climate (Duveiller, Hooker, and Cescatti 2018; Turner, Lambin, and Reenberg 2007; Foley 2005; Le Quéré et al. 2017; Alkama and Cescatti 2016; Adeel et al. 2005). Woody vegetation is closely linked to biomass, carbon stocks, net primary productivity (NPP) and surface energy balance (Foley 2005; Le Quéré et al. 2017; Alkama and Cescatti 2016). Quantifying its dynamics is therefore an important global environmental issue and research priority (Poulter et al. 2014). For instance, it has been shown that both the trend and inter-annual variability of the CO<sub>2</sub> uptake by terrestrial ecosystems are dominated by semi-arid ecosystems, of which savannas and woody vegetation are an important component (Ahlström et al. 2015). Moreover, recent research has shown that tropical dry forests, which are closely linked to savannas in sub-Saharan Africa, are far more extensive than previously thought, thereby highlighting the need for a greater understanding of ecosystem functions and services provided by these biomes (Bastin et al. 2017; Scholes and Archer 1997; Parr et al. 2014). Throughout sub-Saharan Africa, the need for arable land and forest products, such as charcoal, is driving widespread deforestation and forest degradation (Brink and Eva 2009; Baccini et al. 2012; Achard 2002). Simultaneously, a contrasting land degradation process is also widely reported, namely, the thickening of the woody layer and associated loss of herbaceous vegetation (i.e. shrub encroachment) which is of vital economic importance for rural communities relying on cattle (Liu et al. 2015; Ward 2005). Both processes involve changes in woody vegetation cover and are often associated with pervasive land degradation and desertification (Reynolds et al. 2007; Bond et al. 2010). At the same time, several authors questions whether shrub encroachment is a sign of declining ecosystem functioning, and suggesting that encroachment may limit degradation, boost carbon sequestration especially through the drylands (Eldridge et al. 2011; Poulter et al. 2014; Maestre et al. 2009; Soliveres and Eldridge 2014). Thus, there is an inadequate understanding of the extent of woody vegetation change in relation to environmental and socio-economic and environmental drivers. In fact, separating trends in woody and herbaceous functional groups is an active area of research (Helman et al. 2015; Roderick, Noble, and Cridland 1999; Brandt, Hiernaux, Tagesson, et al. 2016). As such, monitoring trends in woody cover and deciphering its relation to climatic and anthropogenic drivers, including precipitation and land management, respectively, is fundamental for sustainable land management and planning (Fensholt et al. 2012).

## **1.1 Satellite remote sensing**

Satellite remote sensing offers a convenient tool to study trends in woody cover, due to its synoptic coverage and cost-effectiveness once calibrated and validated. Several continental-scale tree cover products, available at the spatial resolution of Landsat and Moderate Resolution Imaging Spectroradiometer (MODIS), are widely used to monitor processes such as deforestation (Broich et al. 2014; M. C. Hansen et al. 2013a; Matthew C. Hansen et al. 2016). These products use very high spatial resolution scenes to train a vegetation cover algorithm based on high to moderate resolution imagery. However, our current knowledge of the extent of tree cover and forests in drylands is limited. This is illustrated by substantial spatial disagreements between recent satellite-based global forest maps (Sexton et al. 2016, 2013; M. C. Hansen et al. 2013a) and by the scarcity of large-scale studies of dryland biomes (Durant et al. 2012). Moreover, savannas exhibit pronounced land cover heterogeneity (Sexton et al. 2013, 2016; M. C. Hansen et al. 2013b; Durant et al. 2012), ranging from open grassland

to closed forest while exhibiting high intra- and inter-annual variability in vegetation photosynthetic activity and phenology, which is often enhanced by marked anthropogenic disturbances, including fire and grazing (Matthew C. Hansen et al. 2016; Gessner et al. 2013; M.C Hansen et al. 2002; Bastin et al. 2017).

Within this context, satellite-derived indicators of vegetation dynamics are fundamental to identifying environmental change processes such as land degradation. These indicators are often derived from spectral vegetation indices of satellite imagery, which are related to the vegetation density of canopies. For example, a time-series of Normalized Difference Vegetation Index (NDVI) effectively captures variation in photosynthetic activity, whether it results from phenological cycles or anthropogenic disturbances such as deforestation (Myneni et al. 1995, 1997; Kuenzer, Dech, and Wagner 2015; Sankaran, Ratnam, and Hanan 2008).

The spatial and temporal resolution of MODIS is especially effective for continental-scale monitoring of land surface phenology, which refers to the seasonal and inter-annual variation in surface vegetation photosynthetic activity as measured by satellite vegetation indices (Friedl et al. 2006). In addition, its high temporal imaging frequency allows the negative effects of cloud cover to be overcome; this is important in biomes which are seasonally impacted by cloud cover (M.C Hansen et al. 2002; Jacquin, Sheeren, and Lacombe 2010). Regional-scale modelling of woody cover using MODIS is strengthened by including seasonal phenological metrics which describe contrasting stages in seasonal vegetation growing cycles (i.e. green-up and senescence), rather than simply metrics which represent temporal snapshots (Broich et al. 2014). Such metrics enhance the phenological differences between woody and herbaceous vegetation, and constitute good proxies of woody cover, including all shrubs and trees, and have effectively been used to map trends in woody vegetation for large parts of sub-Saharan Africa (Horion et al. 2014). In addition, MODIS has successfully been used to monitor vegetation phenology (Zhang et al. 2003) and been used in conjunction with satellite-derived precipitation estimates (Zhang et al. 2005).

## **1.2 Phenology of Namibian savannas**

In sub-Saharan savannas, important plant phenological events often occur in response to the seasonal availability of water, although it is widely reported that several vegetation phenophases do not follow this pattern. For instance, pre-rainy season leaf-flushing, as observed across much of sub-Africa, is thought to be driven mainly by photoperiod and temperature cues; here, woody species flower and leaf-out before the onset of the rains (Childes 1988; Ryan et al. 2017). The many woody species found throughout Namibia exhibit different phenophases and vary in the timing of leafing and leaf senescence. However, for most deciduous tree and shrub species, senescence occurs in response to a drop in soil moisture and the onset of lower daily minimum temperatures (Childes 1988). The leaf-on period takes place shortly before the onset of the rainy season (September-October) and leaf-off period ensues throughout the middle of the dry season (April-August). Various species are evergreen, keeping at least a portion of their leaves throughout the dry season, but the majority are strongly deciduous, losing effectively all their leaves during the dry months and experiencing a leaf flush independently and before the first rains. For example, a pre-rainfall leaf flush and synchronized flowering is commonly observed in three tree/shrub

species which are widespread in the northeast, in particular, *Terminalia sericea*, *Ochna pulchra* and *Pterocarpus angolensis* (Childes 1988). In contrast, several common species in closed savanna woodland often demonstrate asynchronous flowering periods, notably *Baikiaea plurijuga* (Childes 1988). Trees and shrubs retain their foliage longer than herbaceous vegetation during the dry season (John Mendelsohn and el Obeid 2005a; Verlinden and Laamanen 2006a). The annual growth of herbaceous biomass relies on the first precipitation events to initiate photosynthesis and remains photosynthetically active during the rainy season, as it is largely dependent on the spatio-temporal distribution of annual precipitation (John Mendelsohn and el Obeid 2005a). Senescence of herbaceous vegetation then takes place at the onset of the dry season once the plants have completed their annual life cycle, while in addition, intense grazing pressure throughout the country contributes to promptly grazing the pasture throughout much the country (John Mendelsohn and el Obeid 2005a). Importantly, this results in woody vegetation remaining photosynthetic during part of the year, while herbaceous vegetation is entirely desiccated (Verlinden and Laamanen 2006b).

Woody vegetation dynamics in savanna biomes can be broadly divided into intra-annual (seasonal) fluctuations, and inter-annual trends (occurring over a period of years). Seasonal fluctuations are mainly controlled by seasonal precipitation and short-term anthropogenic disturbances, such as burning, grazing and vegetation clearing. Environmental factors such as soil type, vegetation community composition and land-use history, also affect the seasonal growth of woody vegetation. Concurrent to shifts in canopy foliar density, are the associated leaf and plant phenology changes, including timing of flowering and leaf senescence; for most tree and shrub species, these are in turn regulated by seasonal water availability and temperature. For instance, the timing of plant phenological stages may vary for a given year, as a function of the seasonal availability of water in certain species, such as leaf flush occurring as a result of early rainfall onset. At the same time, these phenological stages may be influenced by the climatic, anthropogenic and environmental factors listed above (Childes 1988; Ryan et al. 2017; E. N. Chidumayo 2001; Wagenseil and Samimi 2007; Kuenzer, Dech, and Wagner 2015). Importantly, these different processes, their interactions and synergies, contribute to creating a marked variation in the seasonal NDVI signal across savanna biomes. Finally, different plant functional types, including in particular herbaceous vegetation, also have a pronounced seasonal effect on the NDVI signal (Kuenzer, Dech, and Wagner 2015).

In contrast, inter-annual trends impact woody vegetation dynamics over multiple years and thereby encompass the life cycle of trees and shrubs. For example, a minimum period of 5 years is thought sufficient to capture any increases in woody biomass, which is related to woody cover, using satellite indices (Williams et al. 2008; Ryan et al. 2012a; Asner et al. 2003). This is due to the fact that forest inventory parameters used to monitor tree growth, such as diameter at breast height, height, canopy cover and basal area, change slowly over the course of several years (i.e. gradual changes). However, they are also subject to abrupt negative changes, often triggered by deforestation, encroacher bush control or forest fires (Ryan et al. 2012b; Williams et al. 2008; Emmanuel N Chidumayo 1997).

### **1.3 Study region**

The study area comprises the whole country of Namibia and encompasses an extensive and biogeographically diverse southern African savanna biome (Figure 2). The area is semi-arid to arid, with precipitation across the country varying from an annual average of 650 mm in the northeast, to 50 mm in the southwest. Rainfall events are variable both within and  
5 between years for any given period. In the north and central regions, precipitation is concentrated during the five summer months (December to April), while in the southernmost regions it occurs especially in the austral winter (Desmet and Cowling 1999; John Mendelsohn and el Obeid 2005a). Agriculture ranges from subsistence small-scale cropping and ranching on commonages, predominantly across the northern areas, to large-scale commercial ranching and wildlife tourism enterprises on private (free-hold) lands in the central and southern areas; most of the land which is not set aside for  
10 conservation being used for livestock grazing or subsistence agro-pastoralism.

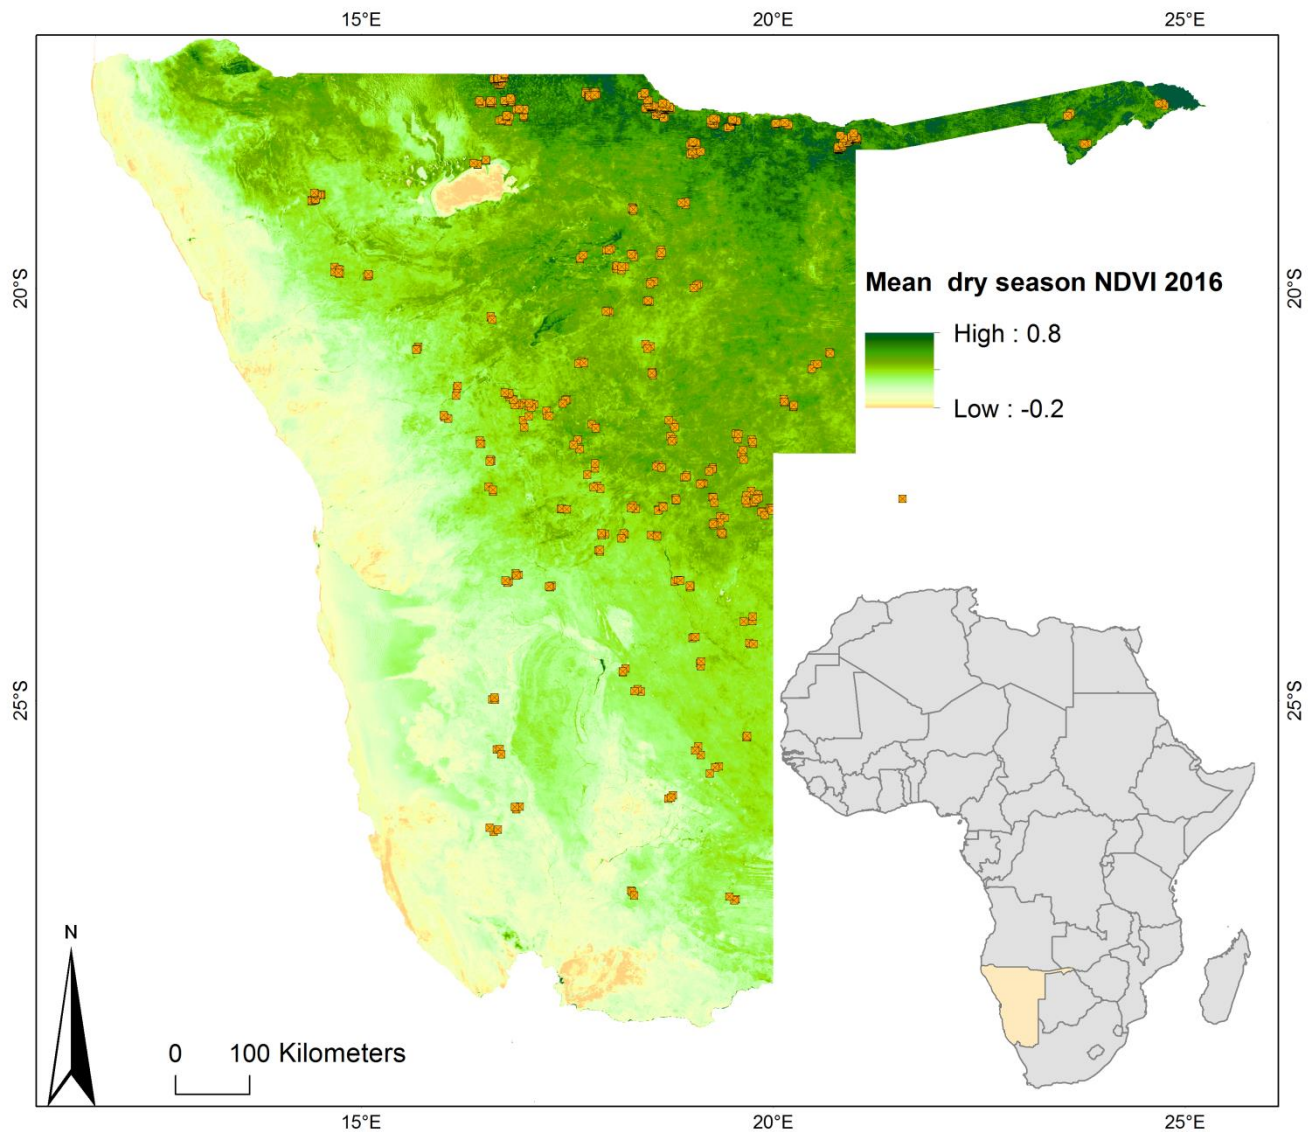

**Figure 1.** The study area encompasses Namibia (822,634 km<sup>2</sup>). The background image is a MODIS mean dry season NDVI image (2016), which enhances the presence of woody vegetation since herbaceous vegetation has already senesced.

5

#### 1.4 Motivation and aims

Against this background, land surface phenology across Namibia is highly variable over time, yet simultaneously reveals clear annual cycles at regional scales (10<sup>4</sup> km<sup>2</sup>) (V. R. Wingate et al. 2018). It is to a large extent driven by the distinctive rainy season (December-April) and the variable proportion of herbaceous and woody vegetation. These display divergent

phenologies, which can be exploited to map either vegetation functional type (Hüttich et al. 2009; John Mendelsohn and el Obeid 2005a). In addition, vegetation change processes, including deforestation and woody encroachment are reported to be widespread in Namibia, yet their spatial and temporal dynamics remain little studied. In particular, the relation of these change processes to land-use, biomes, population density and precipitation trends, are poorly known (John Mendelsohn and el Obeid 2002a, 2005a; Curtis and Mannheimer 2005; V. Wingate et al. 2016; V. R. Wingate et al. 2018). The aims of the following study are therefore to 1) exploit the relationship between phenological metrics and field measurements of woody vegetation cover to create a time-series of percentage woody cover, 2) map trends in woody cover across Namibia, including the rates, trajectory and spatial extent, and 3) evaluate the relationship between trends in woody cover and potential anthropogenic drivers, as well as environmental and climatic gradients, namely, land-use and population density, as well as biomes and precipitation, respectively.

## 2 Material and methods

### 2.1 Approach

An empirical/statistical approach based on the Random Forest algorithm was used to map percentage woody cover (Colombo et al. 2003; Breiman 2001). Here, phenological metrics derived from a MODIS NDVI time-series, together with 484 field-based measurements of percent woody cover sampled over three years (2012, 2014 and 2016), were used to model percentage woody cover at annual intervals, resulting in a study period spanning the period from 2001 to 2016. Outliers NDVI values were attenuated by applying a temporal filter to the original MOD13Q1 NDVI time-series, and subsequently creating monthly mean composites. Phenological metrics which integrate seasonal fluctuations into a single annual metric, characterising the phenology of a particular plant functional types were used to enhance long-term trends by suppressing inter-annual variation. The approach enables a maximum amount of noise and variation to be integrated, and hence enhances gradual trends and changes associated with woody vegetation. A fundamental underlying assumption of these metrics is that the observed NDVI signal during the dry season is derived only from woody vegetation. Thus, phenological metrics act as indicators of woody vegetation cover, while also effectively separating the woody NDVI signal from the herbaceous one. Estimates were validated using independent measurements of tree cover, which are closely correlated with woody cover and hence constitute a proxy. Trend significance was computed using the Mann-Kendall test and the annual rate, trajectory and spatial extent of change was derived using the Theil-Sen slope. These were then evaluated in relation to potential drivers including land-use, population biomes and precipitation. Finally, hotspots of change were selected for further discussion (Figure 2).

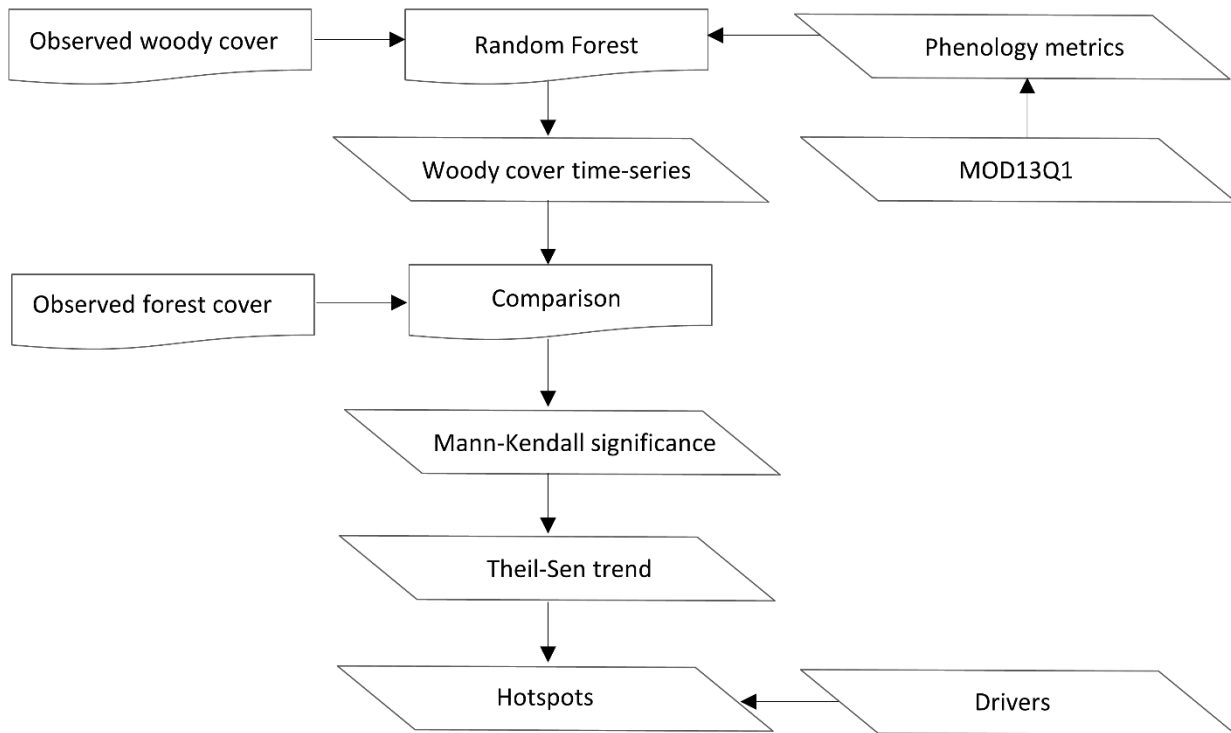

**Figure 2. Schematic workflow diagram illustrating the datasets and approach used to map and evaluate trends in percentage woody cover.**

## 5 2.2 Datasets

### 2.2.1 Field data

Field measurements of percentage woody cover were made at three separate periods, 2012 (July), 2014 (May-June), and 2016 (April-May), across three separate regions and amalgamated into a single calibration dataset, resulting in a total of 483 samples. Only woody cover was used in this study since it aims to map vegetation associated with both deforestation and shrub encroachment, and woody cover is assumed to be representative of either plant functional type (i.e. trees and shrubs). Thus, woody vegetation encompasses both tall and short vegetation, counting trees and shrubs. Field data were collected using the point cover observation method described in Herrick *et al.* (2013), as part of the Land-Potential Knowledge System (J. E. Herrick *et al.* 2013), and consisting of stratified point intercept measurements of plant canopies in a  $50 \times 50$  m area (Jeffrey E Herrick *et al.* 2010). Sample sizes were 100 intercept points in 2012 and 2014, but were increased to 160 points in the 2016 survey. Here, the woody cover per plot represents the % of points covered by either trees or shrubs or both, where each site/plot had 100-160 points. The post-processing and sampling effort was also different for the 2016 dataset, in which data were processed to fractional cover. Therefore, in order for the 2012 and 2014 datasets to be included in the analysis,



fractions of the three primary components (i.e. woody, herbaceous and bare ground) assessed were normalized so that their sum would correspond to 100 percent. In order to ensure the normal distribution, each variable was logarithmically transformed (Zandler, Brenning, and Samimi 2015). Samples with a measured percent woody cover <1% were excluded (n=25) from this analysis in order to apply log transformations, which otherwise would have resulted in negative values, this resulted in a total of 458 available for model calibration.

Importantly, a key challenge in the use of field data for remote sensing research is making sure that the *in situ* field measurements provide a representative sample; this problem is especially pertinent in studies which cover large spatial areas with moderate spatial resolution data. In particular, when using plot-level field data to calibrate and validate remote sensing models at moderate spatial resolutions, the field data needs to be up-scaled to the resolution of the remotely sensed observations (Baccini et al. 2007). In this study, the field plots were not scaled to the resolution of MODIS (250 × 250 m) using spatial averaging; instead, instead, the percentage woody cover computed using the methods proposed by Herrick *et al.* (2013) within the 50 × 50 m field plot was compared with the corresponding MODIS pixel values. We make the assumption, therefore, that the 50 × 50 m field plot adequately captures the average percentage woody cover within the corresponding MODIS pixel. We justify this assumption since the field plots were sampled in homogenous vegetation strata (Baccini et al. 2007). Homogeneity was assessed via visual inspection of high resolution imagery and where possible extensive field observations of vegetation cover and composition.

## 2.2.2 Satellite and ancillary data

### 2.2.2.1 MODIS data

The MODIS MOD13Q1 NDVI time-series gridded level-3 product collection 6 has a number of advantages over the previous collection, making it suited for land surface phenology parameter estimation. A number of improvements have been made on the MODIS vegetation index algorithm, which minimize the confounding effect of bidirectional reflectance distribution functions (Didan 2015). The product is available at 250m spatial resolution, is masked for water, clouds, heavy aerosols, cloud shadows and merged into 16-day composites, which allows only the highest quality values to be used, thus minimizing the impact of cloud cover (Didan 2015). Pixels flagged as low quality were masked; here, only values with a pixel reliability summary QA of 0 were used (where is equal to good data which can be used with confidence). A Savitzky-Golay (SG) smoothing filter was then applied (using the default SG filter settings available in TIMESAT) to each pixel of the time-series to interpolate missing values, smooth outliers and minimize the effects of low quality data resulting from noise and cloud cover, and the time-series was aggregated to mean monthly values. The computation of smoothing filters is recommended since observations over time are often noisy, especially in drylands (Broich et al. 2014).

### 2.2.2.2 Spatial data

To investigate the observed trends in terms of potential drivers, a number of additional datasets were acquired. Land-use data were acquired from the Atlas of Namibia (J Mendelsohn et al. 2002). Biomes distribution was downloaded from the Food and Agricultural Organization Global Forest Resources Assessment (<http://www.fao.org/3/ad652e/ad652e00.htm>); for

Namibia, they comprise tropical desert, tropical dry forest, tropical mountain system and tropical shrub land, the latter two being very similar (Simons et al. 2001). Population density data were obtained from the Worldpop, high resolution global gridded dataset at 100 m resolution, which gives an estimation of the number of people per km<sup>2</sup> in 2015 (Lloyd, Sorichetta, and Tatem 2017). This dataset was classified into four classes, with population densities per pixel ranging from 0-9, 9-53, 53-127, and 127-483 people per 100 × 100 m pixel. The average trends in percentage woody cover were then evaluated for each land-use type, biome and population density class.

### 2.2.2.3 Rainfall data

Monthly precipitation was computed using the Climate Prediction Center Morphing technique (CMORPH) dataset, in which precipitation estimates are from satellite-derived passive microwave and infrared data, and available at a resolution of 0.25° (Joyce et al. 2004). The CMORPH dataset was aggregated to mean annual values and converted to anomalies, based on the overall mean of the time-series. To evaluate the correlation between rainfall and modelled woody cover, the CMORPH anomalies time-series was regressed, as the independent variable, against the time series of annual percentage woody cover anomalies (no time lag were used). In contrast to NDVI which is highly correlated with precipitation (i.e. NDVI integrates the signal from herbaceous vegetation which responds quickly to precipitation), we expect a low correlation between precipitation with predicted woody cover. This is because wooded regions undergo a pre-rainy season green-up (Fensholt et al. 2012; Nicholson and Entekhabi 1987; Herrmann, Anyamba, and Tucker 2005; Nicholson, Tucker, and Ba 1998; Ryan et al. 2017; Childes 1988).

## 2.3 Estimation of phenology metrics

Phenology metrics for each year (2001-2016) were extracted using TIMESAT software, which has been extensively used for measuring seasonal land surface phenology in drylands (Jönsson and Eklundh 2004; Horion et al. 2014; Herrmann and Tappan 2013; Fensholt et al. 2012). Three phenological metrics shown to comprise an indirect measure of woody canopy cover were selected as model predictors, and computed for each year (Table 1). They include the dry season index (DSI), described in Brandt et al. (2016) (Brandt, Hiernaux, Rasmussen, et al. 2016), the mean annual dry season values (MeanDS), and the dry season integral (DSINT) defined in Brandt et al. (2016) (Brandt, Hiernaux, Tagesson, et al. 2016). These metrics reduce the confounding effects of herbaceous vegetation on the woody vegetation spectral signal, by taking advantage of the seasonal period when herbaceous vegetation photosynthetic activity and biomass are at their minimum namely, the dry season (April-August).

In order to test the sensitivity of these metrics for predicting woody cover from field measurements, two phenological metrics known to be related to herbaceous vegetation cover were calculated for each year and included in the model. Predictor variable importance metrics were then computed in order to contrast their effectiveness at predicting observed woody cover. They include, the maximum annual values (MaxWS) taken for each wet season (September-October), and the integral of the difference between the function describing the season and the base level from season start to season end or the

small seasonal integral (SINT) (Jönsson and Eklundh 2004). Calculation of the SINT used values spanning the start of season (SOS) and end of season (EOS), as described in Jönsson and Eklundh et al. (2004), where the onset of the rainy season is inferred by assigning a percentage threshold of 20% of the yearly NDVI amplitude value. Although the 20% threshold is well established for the SOS, it should be interpreted with caution for the EOS, since a number of factors are likely to influence this period, for example, wetlands and cropland remaining photosynthetically active longer than the surrounding herbaceous layer, or a particularly wet year may result in vegetation remaining photosynthetic for longer.

**Table 1. Phenological metrics used in this study, their abbreviation and concise description. Each metric was computed for every years of the study (2001-2016); the resulting short form is then labelled as “DSI2016”, where the year is appended to the short form.**

| Phenological Metric             | Short form | Description                                                                                                              |
|---------------------------------|------------|--------------------------------------------------------------------------------------------------------------------------|
| Annual dry season index         | DSI        | Dry season index, calculated as per Brandt <i>et al.</i> (2016)                                                          |
| Mean annual dry season value    | MeanDS     | The mean annual values taken for the duration of the dry season                                                          |
| Maximum annual wet season value | MaxWS      | The maximum annual values taken for each wet season                                                                      |
| Annual small seasonal integral  | SINT       | Integral of the difference between the function describing the season and the base level from season start to season end |
| Annual dry season integral      | DSINT      | Dry season integral described in Brandt <i>et al.</i> (2016)                                                             |

## 2.4 Estimation of woody cover

### 2.4.1 Random Forest models

The Random Forest algorithm was selected since it is effective at estimating predictor variable importance, integrating multiple predictors variables with different predictive power, and not assuming normal statistical data distribution or any particular relation (i.e. exponential) between dependent and independent variables. Hence it has been used extensively in remote sensing studies to integrate a range of imagery and metrics (Breiman 2001; Moisen and Frescino 2002; Cutler et al. 2007; Prasad, Iverson, and Liaw 2006; V. Wingate et al. 2016). Models were created by taking plot measurements of percent woody cover, with the coincident pixel values of each of the five metrics (Table 1), for every year (2001-2016). In other words, the coincident pixel values of each of the five metrics do not correspond to the timing of the field data; rather the field data, which have been aggregated into a single dataset, are related to each annual time-step of satellite data. This resulted in an annual time-series of modelled percentage woody cover for the period from 2001 to 2016.

### 2.4.2 Model accuracy and comparison

Two measures are used to assess predictor variable importance, including percent increase in Mean Standard Error (MSE) following random permutation, and increase in node purity resulting from all the splits in the forest based on a particular variable, as computed using the gini criterion (please refer to Breiman, 2001 for details). The paired observed and predicted

values were used to compute the Root Mean Squared Error (RMSE) and the coefficient of determination ( $R^2$ ) (Willmott 1982; Stehman et al. 2012). For the Random Forest algorithm where the output is a continuous response, the pixel-wise prediction represents the average of the model trees. Hence, the individual tree predictions offer the opportunity to compute uncertainty metrics including the coefficient of variation (CV) and standard deviation (SD); a large CV and SD suggests higher variability (L. Zhu and Southworth 2013). Finally, model predictions were compared to the recently published 4,684 sample calibration/validation dataset of percentage tree cover from Bastin *et al.* (2017) (all plots located in Namibia) (Bastin et al. 2017); each data point consists of a 0.5-ha plot, visually assessed for tree cover percentage using very high resolution imagery. Since we find observed tree cover percentage and observed woody cover percentage, sampled as part of this study, to be highly correlated ( $r=0.83$ ), we assume the Bastin *et al.* (2017) dataset is assumed to act as a good proxy for percentage woody cover; it provides the latest estimate of tree cover in drylands and is based on the interpretation of contemporary high resolution imagery.

To test the correlation between modelled percentage woody cover and the validation dataset, model predictions were firstly classified into 5% increment classes; the validation dataset was then aggregated and averaged within these classes. The mean values of the validation dataset were regressed with the corresponding values of 5% increment class values, and the  $R^2$  and RMSE computed. This approach aimed to reduce the spread of values from the large number of validation points. No validation has been conducted in the temporal domain due to a lack of long-term field data which would have allowed validating past land cover changes.

## 2.5 Trend analyses

Key aspects surrounding trend estimation from Earth Observation (EO) time-series include temporal and spatial resolution, as well as data quality (Sulkava et al. 2007; Badreldin and Sanchez-Azofeifa 2015). Although trend estimation using linear regression analysis is widely employed, it contravenes several statistical assumptions (Eklundh and Olsson 2003; deBeurs and Henebry 2004). Hence, non-parametric tests which overcome these limitations were applied (i.e. Mann-Kendall and Median Theil Sen trend analyses) (Forkel et al. 2013; deBeurs and Henebry 2004). Furthermore, limitations are incurred by temporally aggregating, for example, to the annual scale, by diminishing temporal resolution. On the other hand, annual aggregation may strengthen trend analysis by eliminating seasonal cycles, which have been found to add seasonal correlation structures and thus augmenting uncertainties (Forkel et al. 2013). In this study, by aggregating NDVI values to average monthly scales, we assume fluctuations due to climate, fire or anthropogenic activity are effectively integrated, permitting the quantification of anomalies, such as deviations from long-term averages, and the strengthening of the signals under investigation, namely that of woody vegetation.

The time-series was first converted to anomalies (deviation from the mean) before applying the trend analysis (Eastman 2009). Subsequently, the statistical significance of the trend was defined by applying a pixel-wise Mann-Kendall trend test to the woody cover time-series. Areas which exhibited no significant trend ( $P \geq 0.05$ ) were masked out and assumed to represent no change. For areas which demonstrated a significant trend ( $P \leq 0.05$ ), the Theil-Sen trend test was applied to the time series.

This approach smooths the annual time-series using a linear trend, and is generally recommended for looking at rates of change in noisy or short time-series, since it is robust in identifying trends and insensitive to outliers (Hoaglin, Mosteller, and Tukey 1983). Additionally, it has been extensively used to measure trends in EO time-series (Fensholt et al. 2012; Z. Zhu et al. 2016; Guay et al. 2014; N Andela et al. 2013).

5 The percentage woody cover time-series was created with the aim of reducing both inter- and intra-annual fluctuations; however, important inter-annual fluctuations in the percentage woody cover time-series values remained apparent. These can be attributed to a variety of factors, including variable atmospheric and weather conditions, together with changing vegetation phenology. In light of these fluctuations, simply applying an image differencing change detection method to estimate annual change would not be reliable; hence, the Theil-Sen trend slope was used. By multiplying the slope by the  
10 number of years, the annual rate of change rate can be computed, thereby providing an estimate of change in percentage woody cover between 2001 and 2016. The resulting annual slope was then spatially aggregated by taking the mean (spatially aggregated mean annual net change) to the country level, land-use types, population density classes and biomes; the mean slope, minimum and maximum change estimates reported. Subsequently, two layers were derived from the significant annual slope image, the percentage woody cover gain (positive slope) and loss (negative slope). Pixel-wise loss and gain were then  
15 aggregated (mean values) at the level of the country and land-use types, to estimate gross gain and loss (i.e. loss and gain) (Table 2). All datasets were projected to the WGS\_1984\_UTM\_Zone\_33N projected coordinate system, and annual slope values we converted from the MODIS resolution ( $250 \times 250$  m) to  $\text{km}^2$  ( $1000 \times 1000$  m) by multiplying by and expansion factor (1.6), where:

Equation (1)

$$\text{expansion factor} = \frac{100,000\text{m}^2}{62,500\text{m}^2}$$

20

### 2.5.1 Multi-temporal imagery evaluation

To qualitatively assess what the observed trends represent on the ground, in terms of land cover change, a visual assessment was undertaken using a range of multi-temporal, high resolution scenes, including Google Earth imagery. The assessment aimed to identify direct drivers namely, human driven land-use and land cover change, such as urbanization and  
25 deforestation, as well as indirect drivers, including land cover changes driven by a combination of climate and human land-use, such as woody encroachment. Two classes were created representing areas mapped as either positive or negative trends, with slopes  $\geq 25\%$  ( $\geq -25\%$ ), using the final Theil-Sen slope image. 10 randomly sampled points were then generated within each class and subjectively assessed for vegetation changes using Corona satellite imagery (6 feet spatial resolution, 1972), contemporary aerial images (0.5 m, 2010), pan-sharpened Landsat 7 imagery ( $\sim 15$  m, 2000), Sentinel-2 imagery (10 m,  
30 2016) and multi-temporal (time-slider tool) Google Earth imagery.

3 Results

3.1 Predictor layer importance and model uncertainty

The evaluation of predictor variable importance yielded a clear pattern: the most important predictors were most often (but not in all cases) the mean dry season values (MeanDS), dry season index (DSI) and dry season integral (DSINT) (in variable order). The least important predictors were consistently the maximum annual wet season value (MaxWS) and annual small seasonal integral (SINT) (except for the 2007 model, in which the DSINT is the weakest, potentially implying an anomalous year). Predictor variable importance for the most recent output (2016) is plotted in (Figure 3). Plots for the remaining years (2001-2015) are provided in the supplementary material (Figure S1). A plot of CV shows that model uncertainty is higher for the arid coastal and southern regions, where percentage woody cover lower and most likely more variable; where percentage woody cover is high and more stable, a lower CV is identified (Figure 3). These results indicate that in areas of lower woody cover, model predictions are the least accurate and should be interpreted with caution.

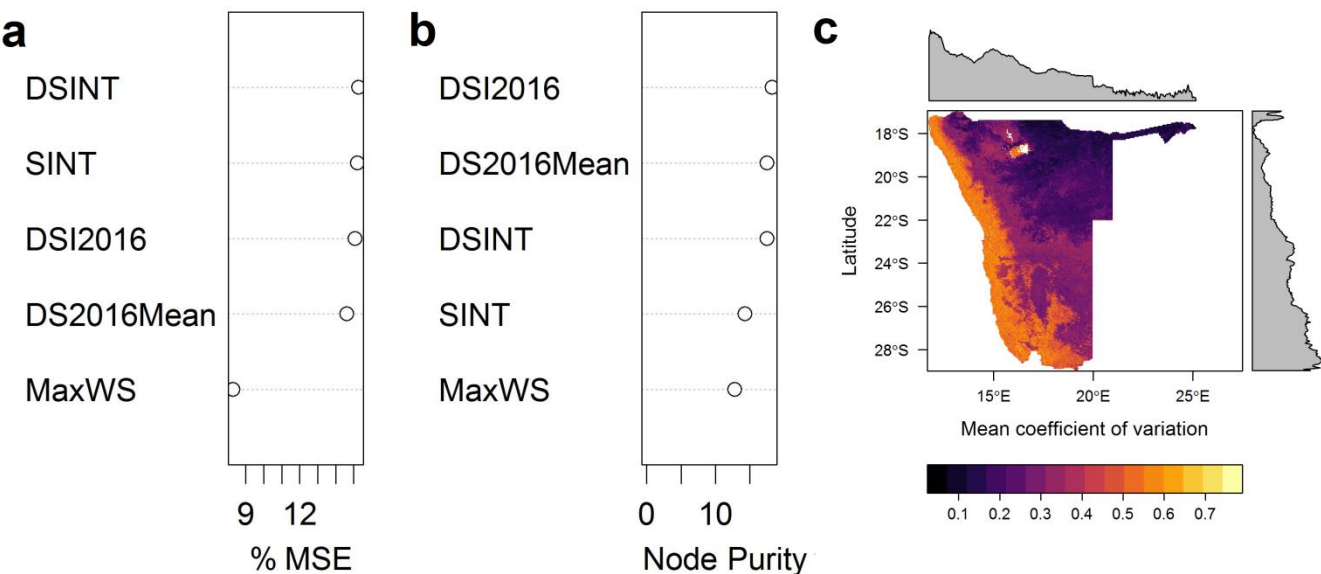

Figure 3. Predictor variable importance for the most recent model (2016) generated using the Random Forest algorithm, evaluated using Mean Standard Error (MSE) (a) and node purity (b): here, predictor variables associated with woody vegetation are (i.e. DSI, DSMean and DSINT) are often more importance that those associated with herbaceous vegetation (i.e. MaxWS and SINT). In addition, Mean coefficient of variation is mapped for the study area, and revealing greater uncertainty in arid coastal regions.

3.2 Model accuracy and comparison

Moderate correlations were found between observed and predicted (2001-2016) percentage woody cover. Figure 4 illustrates the linear relation between observed and predicted (2016) percentage woody cover, yielding an  $R^2$  of 0.47 and an RMSE of 14.47%. Between the 2001 and 2016 models, the  $R^2$  values ranged from 0.4 to 0.5, and the RMSE ranged from 14.14% to 15.43%. Plots for the remaining years are provided in the supplementary material (Figure S2).

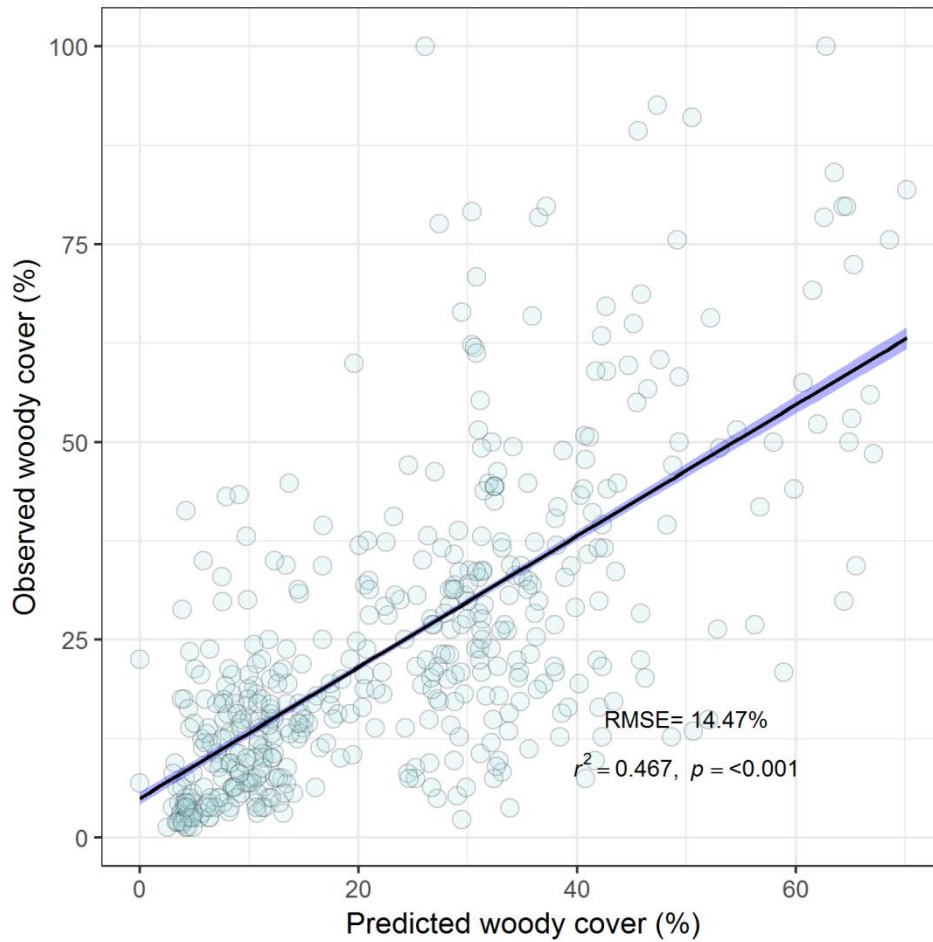

**Figure 4. Linear relation between observed and predicted (2016) percentage woody cover.**

Each annual model prediction was compared to the Bastin *et al.* (2017) percentage tree cover dataset (Bastin et al. 2017). Figure 5 illustrates the linear relationship between percentage woody cover at 5% increment classes (2016), and percentage  
5 tree cover, yielding an  $R^2$  of 0.77 and an RMSE of 3.94%. Between the 2001 and 2016 models, the  $R^2$  values ranged from 0.13 to 0.96, and the RMSE varied from 3.52% to 4.10%. Plots for the remaining years (2001-2015) are provided in the supplementary material (Figure S3).

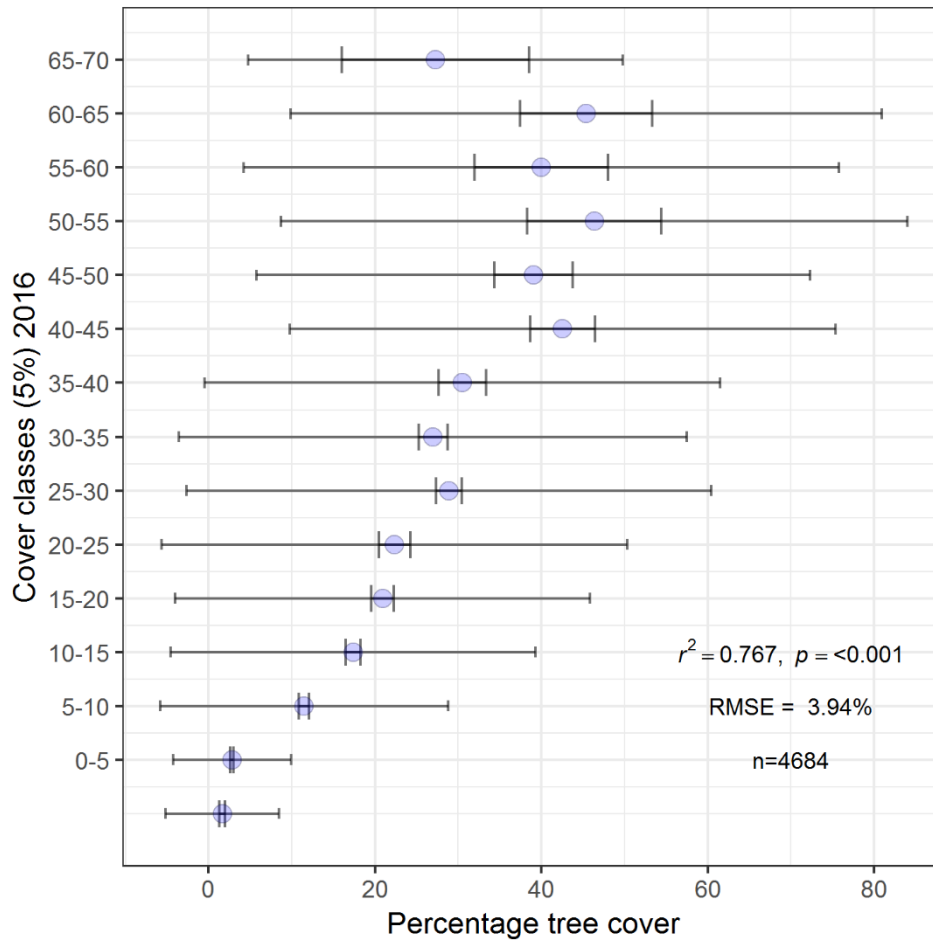

**Figure 5.** Linear relationship between percentage woody cover (2016) at 5% increment classes, and percentage tree cover. Here, each annual estimate of percentage woody cover was compared to percentage tree cover derived from the Bastin *et al.* 2017 dataset. Errors bars show the standard deviation.

### 5 3.3 Trend evaluation in relation to biomes, land-use and population

Tropical shrub land manifested very minor decline ( $-0.17 \text{ \% km}^2 \text{ yr}^{-1}$ ) in woody cover and associated tropical mountain system an increase ( $3.76 \text{ \% km}^2 \text{ yr}^{-1}$ ), respectively. The tropical desert biome displayed a pronounced decrease ( $-4.64 \text{ \% km}^2 \text{ yr}^{-1}$ ) in woody cover, while the tropical dry forest biome experienced the most striking decline ( $-7.39 \text{ \% km}^2 \text{ yr}^{-1}$ ) (Table 2).

**Table 2.** Change in woody cover (annual slope) in relation to biomes.

| Percent woody cover area (2001) |                             |                                         |                                       |                                       |                                       |                                       |
|---------------------------------|-----------------------------|-----------------------------------------|---------------------------------------|---------------------------------------|---------------------------------------|---------------------------------------|
| Biome                           | Woody cover/km <sup>2</sup> | Mean annual net change                  |                                       |                                       | Total change                          |                                       |
|                                 |                             | Slope/ km <sup>2</sup> yr <sup>-1</sup> | Min/ km <sup>2</sup> yr <sup>-1</sup> | Max/ km <sup>2</sup> yr <sup>-1</sup> | Loss km <sup>2</sup> yr <sup>-1</sup> | Gain km <sup>2</sup> yr <sup>-1</sup> |
| Tropical desert                 | 2698569                     | -4.64                                   | -31.96                                | 36.68                                 | -8.70                                 | 1.76                                  |
| Tropical mountain system        | 182080                      | 3.76                                    | -25.23                                | 27.43                                 | -8.34                                 | 7.59                                  |
| Tropical shrubland              | 3421476                     | -0.17                                   | -48.24                                | 37.50                                 | -11.27                                | 9.58                                  |
| Tropical dry forest             | 1432130                     | -7.39                                   | -46.78                                | 54.29                                 | -12.79                                | 15.31                                 |



Trend analysis results for Namibia and its constituent land-use classes are presented in Table 3. The areal extent of modelled woody cover in 2001 ( $\text{km}^2$ ), the spatially aggregated mean annual net change (i.e. slope [ $\% \text{ km}^2 \text{ yr}^{-1}$ ] and minimum and maximum values [ $\% \text{ km}^2 \text{ yr}^{-1}$ ], and total change (i.e. loss and gain) ( $\% \text{ km}^2 \text{ yr}^{-1}$ ) are shown. The average annual slope for Namibia is negative ( $-4.38 \% \text{ km}^2 \text{ yr}^{-1}$ ). In term of land-use types, large-scale communal and urban lands show a positive average annual slope with  $8.42 \% \text{ km}^2 \text{ yr}^{-1}$ , and  $0.37 \% \text{ km}^2 \text{ yr}^{-1}$ , respectively. For the remaining land cover types, mean annual slope was negative, suggesting an overall loss of woody cover (Table 3).

**Table 3. Change in woody cover (annual slope) in relation to land-use, estimated using Theil–Sen trend test, of the time series of annual percentage woody cover area. The 2001 percentage woody cover area, Min and max slopes are included. P represented a Mann–Kendall trend test with  $P < 0.05$  used to define statistically significant trends, with a sample size of  $n = 16$  years. Total change in percentage woody cover was estimated pixel-wise using the Theil-Sen trend test, with losses and gains being summed and converted to  $\text{km}^2$  to compute total loss and gain.**

| Percent woody cover area (2001) |                            |                                      |                                    |                                    |                                    |                                    |
|---------------------------------|----------------------------|--------------------------------------|------------------------------------|------------------------------------|------------------------------------|------------------------------------|
| Land-use                        | Woody cover/ $\text{km}^2$ | Mean annual net change               |                                    |                                    | Total change                       |                                    |
|                                 |                            | Slope/ $\text{km}^2 \text{ yr}^{-1}$ | Min/ $\text{km}^2 \text{ yr}^{-1}$ | Max/ $\text{km}^2 \text{ yr}^{-1}$ | Loss $\text{km}^2 \text{ yr}^{-1}$ | Gain $\text{km}^2 \text{ yr}^{-1}$ |
| Namibia                         | 774588                     | -4.38                                | -4.82                              | 5.42                               | -303                               | 257                                |
| Large-scale communal            | 354332                     | 8.42                                 | -3.55                              | 4.05                               | -21                                | 20                                 |
| Resettlement                    | 5257                       | -12.59                               | -3.17                              | 2.42                               | -21                                | 12                                 |
| Government agriculture          | 48697                      | -8.11                                | -2.58                              | 3.65                               | -20                                | 27                                 |
| Other government                | 16159                      | -12.32                               | -3.07                              | 2.72                               | -18                                | 6                                  |
| Urban                           | 6741                       | 0.37                                 | -4.67                              | 5.42                               | -18                                | 21                                 |
| State protected                 | 246907                     | -6.26                                | -3.58                              | 2.98                               | -18                                | 15                                 |
| Small-scale Communal            | 88852                      | -14.94                               | -3.57                              | 3.87                               | -19                                | 16                                 |
| Freehold                        | 6982                       | -7.76                                | -4.82                              | 4.14                               | -20                                | 11                                 |

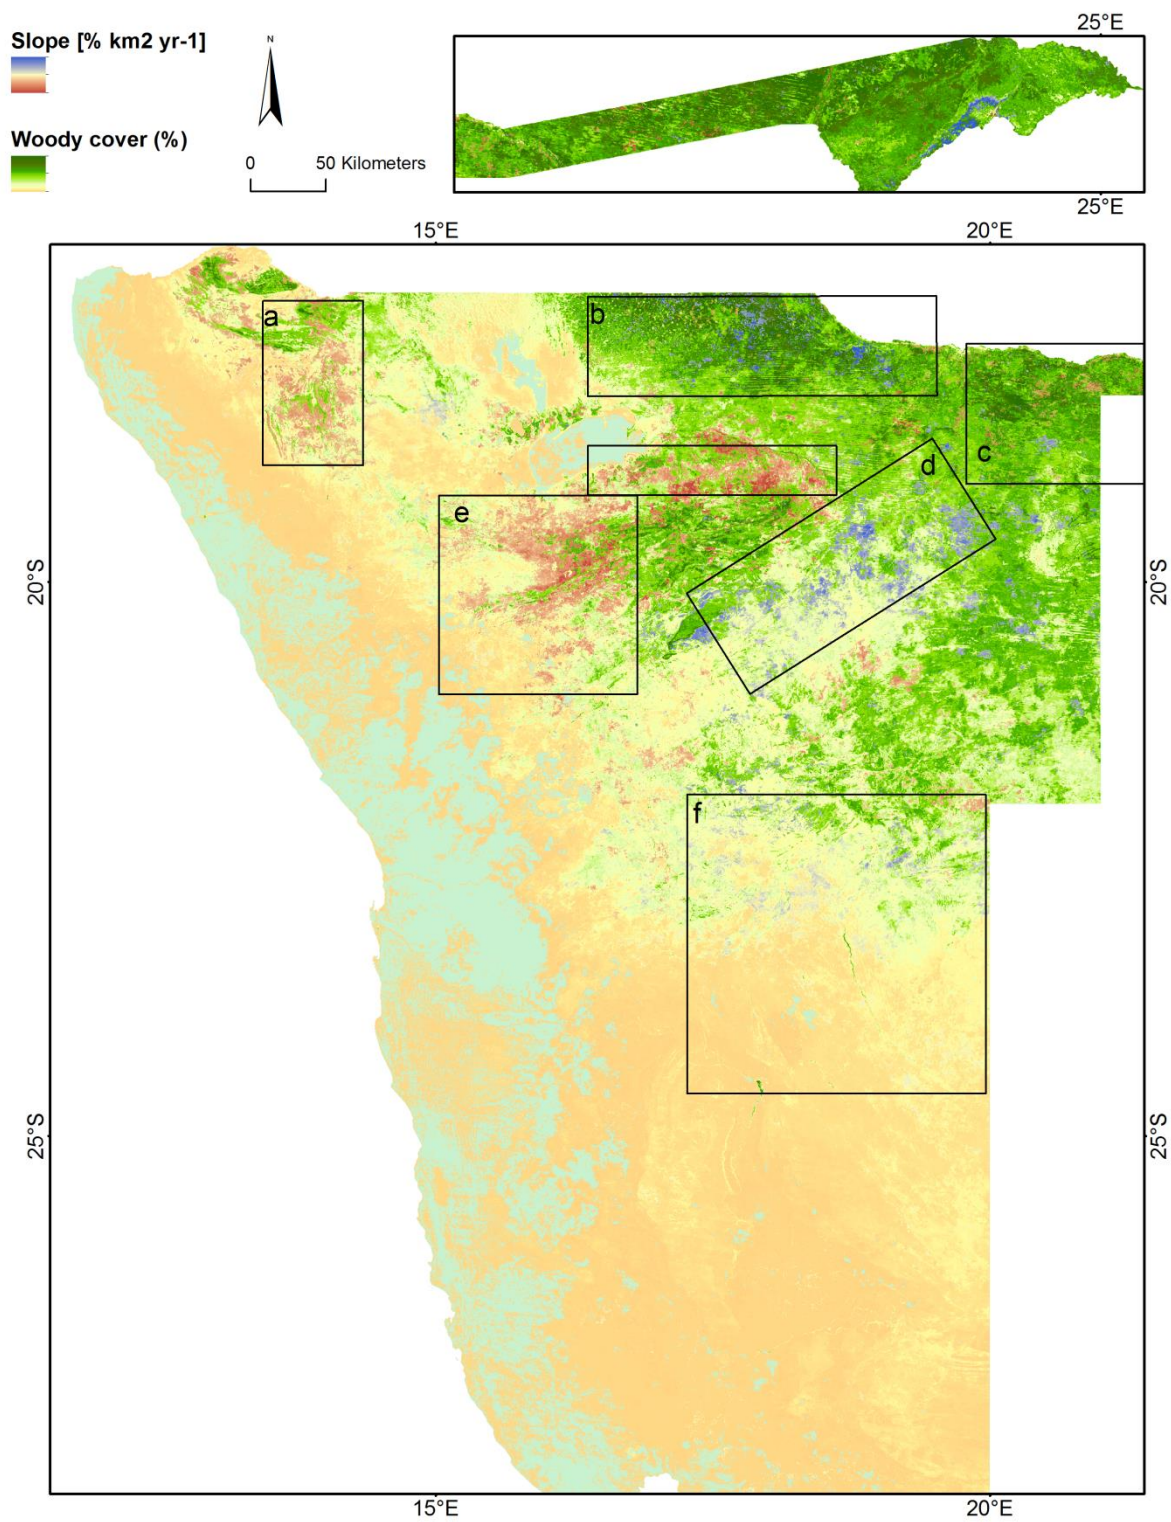

**Figure 6.** Maps the significant positive (negative) Theil-Sen trend slope, including hotspots of change selected for further discussion marked in black rectangles (c-h), overlaid on modelled percentage woody cover for the study area in 2016. Positive trends are shown in blue and negative in red.

5 Most of the country (>99.86%) has a low population density, with between 0-9 people per km<sup>2</sup> (Table 4). Areas of “no data” cover a relatively large area (0.11%), while the remaining population density classes (0-9, 9-53, 53-127, 127-483 people per km<sup>2</sup>) occupy 0.03% of the remaining land area. The average slope values for each population density class are listed in Table 4. All population density classes show an average negative trend, with the strongest decline being in the middle 9-53, 53-127 classes, (-11.10 % km<sup>2</sup> yr<sup>-1</sup>, -8.12 % km<sup>2</sup> yr<sup>-1</sup>, respectively).

10

**Table 4.** Change in woody cover (annual slope) in relation to population density classes.

| Percent woody cover area (2001) |                             |                                         |                                       |                                       |                                        |                                        |
|---------------------------------|-----------------------------|-----------------------------------------|---------------------------------------|---------------------------------------|----------------------------------------|----------------------------------------|
|                                 |                             | Mean annual net change                  |                                       |                                       | Mean annual change                     |                                        |
| Population density              | Woody cover/km <sup>2</sup> | Slope/ km <sup>2</sup> yr <sup>-1</sup> | Min/ km <sup>2</sup> yr <sup>-1</sup> | Max/ km <sup>2</sup> yr <sup>-1</sup> | Loss/ km <sup>2</sup> yr <sup>-1</sup> | Gain/ km <sup>2</sup> yr <sup>-1</sup> |
| NoData                          | 573.42                      | -3.43                                   | -50.40                                | 69.31                                 | -22.23                                 | 24.08                                  |
| 0-9                             | 773104.77                   | -4.38                                   | -77.18                                | 86.86                                 | -18.93                                 | 16.08                                  |
| 9-53                            | 223.32                      | -11.10                                  | -48.55                                | 7.60                                  | -13.61                                 | 3.95                                   |
| 53-127                          | 20.65                       | -8.12                                   | -23.98                                | -3.52                                 | -8.12                                  | 0.00                                   |
| 127-483                         | 6.74                        | -4.20                                   | -4.20                                 | -4.20                                 | -4.20                                  | 0.00                                   |

### 3.4 Trend assessment using multi-temporal imagery

Of the 20 randomly sampled points assessed for each trend slope class (i.e. ≥25% and ≥-25%), two examples exhibiting  
15 characteristic land cover changes were selected for further discussion. They include a direct human impact, namely land clearing (shown in Figures 7a and 7b), and an indirect impact, potentially manifesting as greening (shown in Figures 7c and 7c). For the remaining randomly sampled points in the ≥25% trend class, no clearly apparent land cover changes could be distinguished, using the available imagery and sampling method.

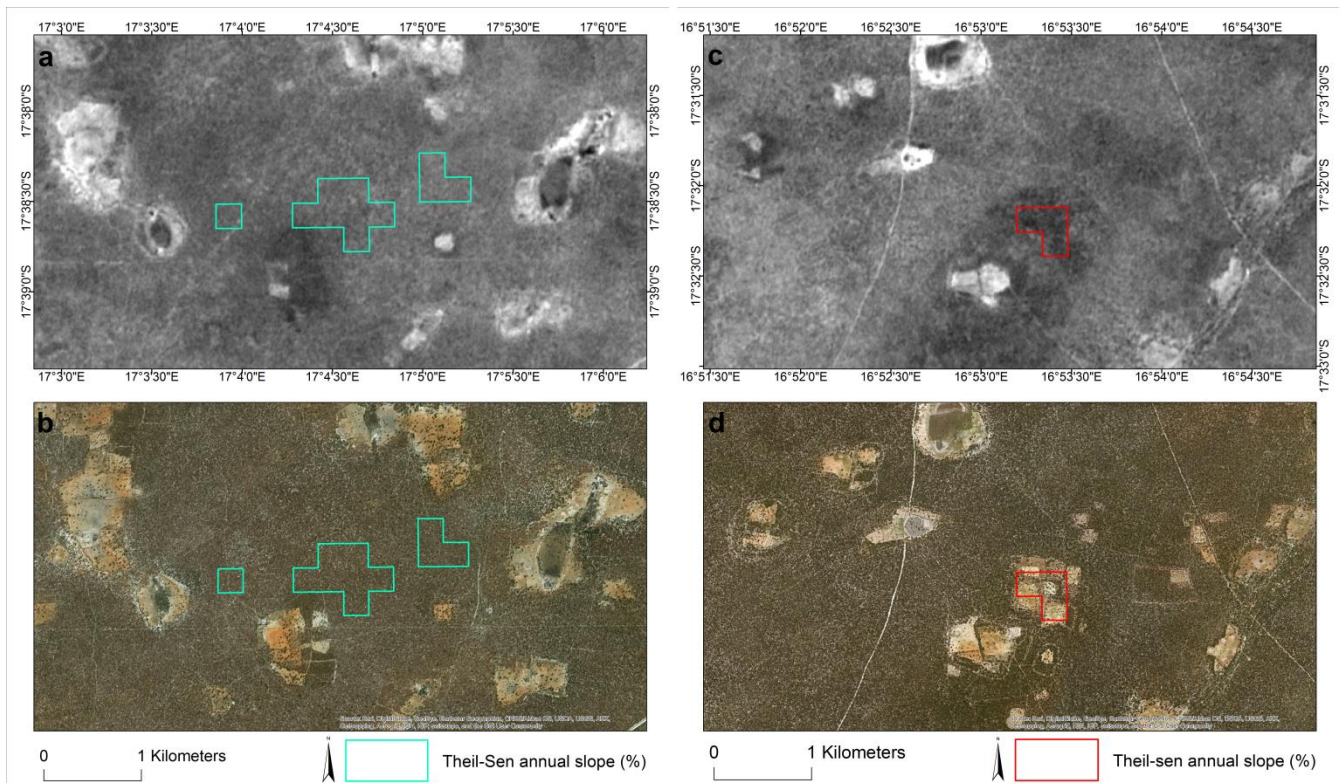

**Figure 7. A qualitative assessment of what the observed trends represent on the ground, in terms of land cover change, was undertaken by visual assessment of multi-temporal, high resolution imagery and random sampling. For a point randomly sampled in an area with a significant positive slope ( $\geq 25\%$ ), no apparent change can be identified using a 1972 Corona image (a) and a 2010 aerial othrophoto (b); such results may be indicative of indirect change. In contrast, for a point randomly sampled in an area with a significant negative slope ( $\geq -25\%$ ), visible changes manifest as land clearing for small-scale agriculture, and are indicative of direct change; these are identified using a 1972 Corona image (c) and a 2010 aerial othrophoto (d).**

- 10 To qualitatively assess what the observed trends represent on the ground, in terms of land cover change, a visual assessment was undertaken using a range of multi-temporal, high resolution scenes, including Google Earth imagery. The assessment aimed to identify direct drivers namely, human driven land-use and land cover change, such as urbanization and deforestation, as well as indirect drivers, including land cover changes driven by a combination of climate and human land-use, such as woody encroachment. Two classes were created representing areas mapped as either positive or negative trends, with slopes  $\geq 25\%$  ( $\geq -25\%$ ), using the final Theil-Sen slope image. 10 randomly sampled points were then generated within each class and subjectively assessed for vegetation changes using Corona satellite imagery (6 feet spatial resolution, 1972), contemporary aerial images (0.5 m, 2010), pan-sharpened Landsat 7 imagery ( $\sim 15$  m, 2000), Sentinel-2 imagery (10 m, 2016) and multi-temporal (time-slider tool) Google Earth imagery (Figure 7).

### 3.5 Trends in relation to precipitation

The linear regression between mean annual precipitation anomalies (independent) and annual percentage woody cover anomalies (dependent), reveals that the majority of  $R^2$  values are low, signifying no significant linear relationship. The result implies that anomalies in precipitation are not coupled with those of percentage woody cover for most of the country, except along the western escarpment (Figure S4).

## 4 Discussion

### 4.1 Trend evaluation

#### 4.1.1 Biomes

Globally, arid and semi-arid (desert) biomes have recently been found to exhibit large decreases in short vegetation ( $\leq 5$  m in height) and important increases in bare ground, with both trends pointing to long-term land degradation; simultaneously, the world's tropical shrub land biome is reported to have experienced a considerable areal increase in short vegetation and a concurrent bare ground loss, and these results are postulated to be the result of woody encroachment (Song et al. 2018). In contrast, the tropical dry forest biome is found to have undergone significant levels of deforestation (Song et al. 2018). When evaluating the results from Song et al. (2018) for Namibia only, an overall greening trend from 1982 to 2016 can be identified. On average for each FAO biome, a decrease in bare ground and a simultaneous increase and short vegetation can be noted, while a gain in tree canopy is seen across the tropical dry forest biome. Our results differ in that we identify an overall browning trend with an average slope of  $-4.38 \text{ km}^2 \text{ yr}^{-1}$ , with an especially marked decrease in woody cover across the tropical dry forest biome ( $-7.39 \text{ km}^2 \text{ yr}^{-1}$ ). These contrasting results may be due to the different spatial ( $0.05^\circ \times 0.05^\circ$  compared to  $250 \text{ m} \times 250 \text{ m}$ ) and temporal (1982-2016 compared to 2001-2017) scales of the studies. Importantly, they serve to highlight how these two factors can lead to substantially differing results when analysing EO time-series.

Of the four biomes which Namibia encompasses, large parts of the country are desert (38.45%), shrub land (including mountain system) (43.74%) and dry forest (17.81%) (Simons et al. 2001). Tropical shrub land showed only a very small decline in woody cover ( $-0.17 \text{ \% km}^2 \text{ yr}^{-1}$ ), and the closely related tropical mountain system an increase ( $3.76 \text{ \% km}^2 \text{ yr}^{-1}$ ), indicating overall woody encroachment. In contrast, the tropical desert biome showed a marked decline ( $-4.64 \text{ \% km}^2 \text{ yr}^{-1}$ ) in woody cover, suggesting long-term land degradation. Lastly, the tropical dry forest biome experienced the most pronounced decline in woody cover ( $-7.39 \text{ \% km}^2 \text{ yr}^{-1}$ ), pointing to extensive deforestation (Table 3).

Overall, our results point to the occurrence of contrasting land cover change processes, with both gains and loss in woody cover. We find that woody cover loss is associated with the more humid areas (tropical dry forest) and is therefore potentially the result of deforestation/forest degradation, which has been shown to be taking place (V. Wingate et al. 2016; V. R. Wingate et al. 2018). The desert biome also exhibited a woody cover loss; such losses in arid biomes are often



associated with desertification and land degradation (Song et al. 2018b). In contrast, the tropical shrub land and mountain biomes demonstrated an increase woody cover suggesting greening and in turn shrub encroachment (Saha, Scanlon, and D'odorico 2015). Our results mirror those recently publish by Brandt et al. (2017) in that their pan-African study on trends in woody cover found that negative trends were preferentially associated with humid, high biomass forest biomes, while positive trends were mostly found across drylands, except very hot xeric ecoregions or tropical deserts (Brandt et al. 2017).

However, in contrast to the results of this study, they find a greening trend predominating across Namibia; this discrepancy can most likely be explained by the different temporal, spatial and spectral resolutions of the datasets used. Here, Brandt *et al.* (2017) employed the 0.25° spatial resolution 1992-2011 vegetation optical density dataset, derived from satellite passive microwave measurements.

#### 4.1.2 Land-use and population

The overall positive trend in percentage woody cover ( $8.42 \% \text{ km}^2 \text{ yr}^{-1}$ ) identified for large-scale agriculture on communal land agrees with previous studies, in that a high density of encroacher species, at early growing stages, were identified in these regions (De Klerk 2004a). However, they may also result from other land management practices, such as agro-forestry and large-scale fencing of commonage, which are known to cause an overall increase in woody and herbaceous vegetation (John Mendelsohn and el Obeid 2002b). However, this result is also unexpected, since the land-use type has been shown to be experiencing substantial land clearing for cropping and ranching (V. Wingate et al. 2016; V. R. Wingate et al. 2018). The limited increasing trend ( $0.37 \% \text{ km}^2 \text{ yr}^{-1}$ ) observed for urban land areas is again unexpected, since rapid urbanization, associated with vegetation cover losses, is occurring throughout Namibia (V. Wingate et al. 2016).

A decrease of  $-14.94 \% \text{ km}^2 \text{ yr}^{-1}$  in woody cover is identified across small-scale agriculture on communal land; while a similar loss of  $-12.59 \% \text{ km}^2 \text{ yr}^{-1}$  can be noted on resettlement land. This trend is most likely the result of widespread vegetation clearing for small-scale cropping and ranching (John Mendelsohn and el Obeid 2002a; V. Wingate et al. 2016). Importantly, it is likely that as a consequence of the moderate spatial resolution of MODIS, much of the small-scale deforestation is being concealed; in fact its resolution has been shown to hide up to 50% of small-scale deforestation (Anderson et al. 2005; Hammer, Kraft, and Wheeler 2014; Matthew C. Hansen and Loveland 2012). The negative trend identified across protected areas ( $-6.26 \% \text{ km}^2 \text{ yr}^{-1}$ ) is unexpected, since conservation efforts in Namibia, especially in the Kalahari woodland ecoregion, focus on the preservation of woodlands and forests (John Mendelsohn and el Obeid 2005b). However, long-term fire-scar monitoring studies throughout the northern regions of the country, where much of the conservation areas are found, identify increasing fire frequencies. More frequent fires are associated with a decrease in tree stem diameters, densities and species diversity, and is potentially being driven by more intensive land management ("Ministry of Agriculture, Water and Forestry. 2017. Monthly Burned Area Report, August 2017" 2017; Sankaran, Ratnam, and Hanan 2008; De Cauwer et al. 2016; John Mendelsohn and el Obeid 2005b) (Table 2).

An important environmental and socio-economic question for much of northern Namibia and neighboring countries is the expansion of small-scale arable cropping into marginal land (Pröpper et al. 2010). The primary reason for this expansion is

the demand for farm land due to population growth; in addition, the on-going land reform is introducing land privatization and hence important changes in land-use on commonages, for instance, large-scale fencing (John Mendelsohn and el Obeid 2005b). Furthermore, since the end of the civil war in 1990, the region has undergone important infrastructural developments, with new roads connecting much of the north and neighboring countries, together with the establishment of water and power infrastructure. These have greatly facilitated access to and settlement of remote regions, promoting the expansion of new farmsteads and villages. The greater need for arable land and the consequent heightened pressure on it for the extraction of natural resources such as timber, lead to a reduction in woody cover (Pröpper et al. 2010; Röder et al. 2015; Anne Schneibel et al. 2017; A Schneibel et al. 2013; V. Wingate et al. 2016; De Cauwer et al. 2016).

Across agriculture and tourism on freehold land, the negative trends observed ( $-7.76 \% \text{ km}^2 \text{ yr}^{-1}$ ) may be the result of encroacher shrub control (De Klerk 2004a). This land management activity is widely implemented on commercial farm land in order to favor herbaceous vegetation growth which supports livestock production (John Mendelsohn and el Obeid 2005c) (Table 2).

The 9-53, 53-127 population density classes exhibited the largest declines in woody cover ( $-11.10 \% \text{ km}^2 \text{ yr}^{-1}$ ,  $-8.12 \% \text{ km}^2 \text{ yr}^{-1}$ , respectively), suggesting densely populated regions are responsible for most land cover changes associated with decreases in woody vegetation cover. Table 4 shows the mean trend values for each population density class as being largely negative, indicating that overall, decreases in woody cover occur across population density classes, and implying that population density may have a role in explaining the observed trends.

#### **4.1.3 Multi-temporal imagery assessment**

Qualitative analysis of historical and contemporary high resolution imagery, using a random sample of ten points distributed in areas with slopes  $\geq 25\%$  ( $\leq -25\%$ ), enabled the observed trends to be interpreted as specific land cover changes. In particular, negative trends were chiefly identified as a general reduction in vegetation cover, together with a concurrent increase in bare ground cover, vehicle tracks and farm plots, thereby indicating a direct human impact (Figure 7). However, when evaluating areas exhibiting positive trends, land cover changes were harder to conclusively identify. For instance, no apparent change can be seen in Figures 8a and 8b, yet this area was mapped as having undergone a significant positive trend. These results suggest the occurrence of indirect impacts manifesting gradually; as such they may comprise increases in vegetation density.

#### **4.1.4 Precipitation**

Low  $R^2$  values, resulting from the linear regression between percentage woody vegetation cover anomalies and precipitation anomalies, are seen across much of the country. The of cause of this may be that much of the country's densely wooded areas are photosynthetically active before the on-set of the rainy season i.e. pre-rainfall leaf flush (Childes 1988; Ryan et al. 2017). In other words, anomalies in NDVI and hence woody vegetation cover, were anticipated to occur independently of anomalies in precipitation. Hence, from the un-coupled relationship observed between both variables, we may conclude that

the model is, to a certain extent, effective at predicting woody cover, with the low  $R^2$  supporting the effectiveness of using dry season phenological metrics to predicted woody cover. Finally, the high  $R^2$  values observed throughout a portion of the western escarpment region may be a response specific to vegetation communities or species avoiding drought by not leafing-out in dry years, such as the widespread *Senegalia reficiens* (pers. comm. C. van der Waal, 2017).

## 5 4.2 Regional hotspots

Namibia is comparatively heterogeneous in terms of eco-floristic regions and climate and consequently land-use, due to the pronounced altitudinal and climatic gradients (John Mendelsohn and el Obeid 2005c). Large parts of the south and western coast of the country are hyper-arid to arid and have very low woody vegetation cover, which may help explain why little or no significant trends were identified here. In these regions the land is mainly used for extensive grazing with little or no cropping being practiced due to the extreme aridity (J Mendelsohn et al. 2002). Figure 6, which illustrates significant trends in woody cover across Namibia, suggests that there are important differences in the spatial pattern of trends across the country; based on this observation, six areas were qualitatively selected for further discussion (Figures 5a to f).

The Kaokoland region (Figure 6a) exhibits important negative trends in woody cover; this region is primarily composed of mopane woodland which are often used as coppice stands harvested for building material. Being sparsely populated during the civil war, the mopane woodland in this region is thought to have widely regenerated and may now be extensively utilized (John Mendelsohn and el Obeid 2005c).

The Ohangwena and Kavango West border regions (Figure 6b) display significant positive trends; these findings are somewhat unexpected, since the area is known to be experiencing small-scale deforestation for urbanization and rain-fed crop farming (V. Wingate et al. 2016). However, evidence suggests shrub encroachment is also occurring in these areas, potentially contributing to explaining the observed greening trends (De Klerk 2004b; Erkkilä, A 2001). Further, the moderate spatial resolution of MODIS is probably masking small-scale deforestation which is likely to be co-occurring adjacent to greening trends.

In the Kavango East region (Figure 6c), a spatially heterogeneous pattern of trends can be observed, with negative trends predominating. Increasing fire frequency is the likely cause of this, as demonstrated by the long-term Namibian fire monitoring data (“Ministry of Agriculture, Water and Forestry. 2017. Monthly Burned Area Report, August 2017” 2017). These data agree with a recent study demonstrating regional increasing fire activity (Niels Andela et al. 2017).

Figure 6d highlights widespread positive trends; this area comprises both large and small-scale agriculture on communal land in the southeastern portion of the rectangle, as well as agriculture and tourism on freehold land on the north-western side. Despite the different land-uses present within the demarcated area, a very homogeneous trend is observed, possibly suggesting widespread encroachment by *Senegalia mellifera* and *Dichrostachys cinerea* occurring across land-use types (De Klerk 2004b).

Important negative trends in woody cover were identified across the region south of Etosha National Park (Figure 6e). These may be the result of several consecutive low rainfall years and a high density of elephants (*Loxodonta africana*), which in



combination led to a net decline in woody cover (de Beer et al. 2006). The central eastern area (Figure 6f) which comprises freehold land again reveals widespread positive trends, pointing to the occurrence of shrub encroachment by *Senegalia mellifera* (De Klerk 2004b).

### 4.3 Trend analysis

5 Recent studies find a greening trend in satellite-derived vegetation proxies across southern Africa; however, interpreting these trends in terms of ecologically meaningful, measureable and identifiable vegetation properties, for instance, in terms of plant functional type, is often problematic (Song et al. 2018; Saha, Scanlon, and D'odorico 2015; Brandt et al. 2015; Z. Zhu et al. 2016). We find woody cover has decreased overall and several recent studies corroborate these findings; for example, decreases in NPP were identified in the adjacent Okavango, Kwando and upper Zambezi catchment areas over a 29-year  
10 period using MODIS (L. Zhu and Southworth 2013). Similarly, Andela et al. (2017) find an increasing trend in fire activity across much of the north east of the country which implies less woody cover (Sankaran, Ratnam, and Hanan 2008; De Cauwer et al. 2016; Niels Andela et al. 2017). These results stand in contrast to those of Tian et al. (2016) (Tian et al. 2016), who identify increases in woody density across southern Africa, and Fensholt et al. (2012) (Fensholt et al. 2012) who identify greening trends. However, both these studies rely on coarse spatial resolution data (i.e.  $0.25^\circ$ , 8 km and  $0.05^\circ \times$   
15  $0.05^\circ$ , respectively) and cover different time periods (2000-201 and 1981-2007, respectively). Furthermore, they do not provide country-specific change statistics, but only regional approximations.

The south-north and west-east gradient of increasing percentage woody cover reflects the different eco-floristic regions (Figure 6). Northern regions consist of Kalahari and mopane woodlands, whereas the southern regions are made up of grass and shrub land, which exhibit lower woody cover densities (J Mendelsohn et al. 2002; John Mendelsohn and el Obeid  
20 2005b). The overall decline in woody vegetation cover is therefore likely to be occurring in the north of the country, and be associated with declining tree and shrub stem numbers; these variables are related to aboveground biomass, as well as foliar and canopy density (Asner et al. 2003; Asner and Heidebrecht 2005; Asner and Lobell 2000). In effect, Wingate *et al.* (2018) identified a net loss of aboveground woody biomass for the northern Kalahari ecoregion (V. R. Wingate et al. 2018). Based on our results, we may conclude that decreases in vegetation biomass associated with woody vegetation are also taking  
25 place, especially in the desert and tropical dry forest biomes; however, since the approach used does not permit the direct estimation of change in carbon stocks, a precise inventory of loss and gains cannot be undertaken. Several anthropogenic and biophysical factors are known to drive decreases in woody cover. In particular, they include long-term changes in precipitation patterns, disturbances resulting from cattle grazing, high densities of browsers, fires, timber extraction and land clearing (Sankaran, Ratnam, and Hanan 2008; Sankaran et al. 2005; De Cauwer et al. 2016).

30 Gains in woody cover are thought to be driven by factors including reforestation, conservation land management activities and raising atmospheric  $\text{CO}_2$  concentrations, which under certain conditions have been found to favor C3 plants over C4, and the interaction of these factor presumably leading to shrub encroachment (Donohue et al. 2013; John Mendelsohn and el Obeid 2005a; Saha, Scanlon, and D'odorico 2015). Finally, most of the study area (92.2%) exhibits no significant trends,

which agrees with several long-term studies demonstrating vegetation to be remarkably stable in the region (O'Connor, Puttick, and Hoffman 2014; Buitenwerf et al. 2012; Rohde and Hoffman 2012).

#### 4.4 Model accuracy and limitations

Both predictor layers MaxWS and SINT are proxies for herbaceous vegetation; their low ranking is indicative of the higher correlation between field measurements of woody cover and phenological metrics characterizing woody vegetation. Similarly, when model predictions are compared to percentage tree cover, an increasing spread of values can be noted in the higher predicted percentage woody cover classes, as indicated by the black standard error bars (Figure 5) (Bastin et al. 2017). The low RMSE error observed suggests both datasets show a moderately good agreement, in spite of the fact that the datasets measure distinct variables using different methodologies, which makes their comparison prone to a multitude of confounding factors. Low  $R^2$  values are the result of single outliers (percentage tree cover) within woody cover classes. The low  $R^2$  found when comparing observed and predicted values result from several limitations related to the phenological metrics, field measurements and nature of the savanna system. Limitations associated with the phenological metrics include, pixel resolution, spectral limitations, the use of monthly averages causing the lose of the full suite of variation in NDVI values, and the temporal mismatch between the field observations and the coincident pixel phenological metric values (John Mendelsohn and el Obeid 2005a). Limitations associated with field measurements include, the different sample sizes (e.g. 100 point observations per site for the 2012 and 2014 datasets, compared to 160 point for the 2016 dataset); date of field data collection (i.e. 2012, 2014, 2016); and a modified methodology adopted for the samples collected in 2016. Moreover, the small field plot size may not be adequately representative at the spatial resolution of the MODIS data, and similarly, the field sample sites may not be sufficiently representative of the variability within predictor metrics (i.e. more variability within a pixel than between pixels) (Baccini et al. 2007). The seasonal phenological cycles of woody and herbaceous vegetation in response to precipitation and temperature cues, results in a variable NDVI signal for any given period. This causes the computed phenological metrics to vary annually, in relation to the static field plot estimates. Furthermore, management actions, such as grazing and fire are likely to have impacted both the sample sites and the coincident pixel values of each metric. In particular, fire scars, which are often extensive, cause the NDVI signal to fluctuate importantly and hence affect the phenological metrics. Fire is an important factor shaping vegetation structure and composition across Namibia, with certain areas routinely experiencing grass fires during the on-set of the dry season (John Mendelsohn and el Obeid 2005c). Lastly, the diverse vegetation characteristics, including species composition and structure, encompassed within the field sites used for model calibration, are likely to not be fully representative of the overall local to regional vegetation characteristics, resulting in decreased model accuracy (Carreiras, Vasconcelos, and Lucas 2012; V. R. Wingate et al. 2018). These may include for example, among other biotopes, wetlands and floodplains which are ephemerally submerged in water, and where herbaceous perennial plants can remain green for longer periods (Hüttich et al. 2011).

Several additional limitations are likely to have introduced inaccuracies into the modelling of woody cover. For instance, NDVI is well correlated with vegetation chlorophyll content, leaf color, vegetation density and depth, soil color and

moisture, as well as being a good indicator of NPP in drylands. However, it is limited by effects of soil and senesced vegetation background and signal saturation at high biomass levels, while in addition not being directly correlated with woody cover (Sellers et al. 1992; Asrar et al. 1984; Prince 1991; Pettorelli et al. 2005). Furthermore, savanna biomes are often characterized by several vegetation strata, ranging from tall tree canopies to shrub and herbaceous layers, all of which exhibit distinct phenophases (E. N. Chidumayo 2001). Taken together, this variability in these factors contributes to impacting the regularity and rigorousness of the phenological metrics extracted.

## 5 Conclusion

This study provides a new estimate of change in woody cover across Namibia. Annual maps were created based on contemporary field measurements and MODIS NDVI metrics aimed at enhancing the distinct phenophases of woody and herbaceous vegetation. The resulting time-series was used to map trends in woody cover, which are excellent indicators of vegetation changes, including shrub encroachment and deforestation. The annual rate, trajectory and spatial extent of change was evaluated in relation to potential drivers, including biomes, land-use, population density and precipitation.

On average, a loss of woody cover was identified; specifically, the desert and tropical dry forest biomes displayed a marked decline in woody cover, pointing to long-term land degradation, and deforestation/forest degradation, respectively. In contrast, tropical shrub lands demonstrated increases in woody cover, suggestive of woody encroachment. These results reflect those of a recent pan-African study on trends in woody cover (Brandt et al. 2017). Here, we identify contrasting change processes, where woody cover loss is associated with more humid areas (tropical dry forest), and very arid areas (tropical desert), while woody cover gain predominated across the intervening tropical shrub lands.

Certain land-uses exhibited pronounced declines, notably protected areas; here these changes may be due to woody vegetation die-back caused by large herbivores and below average rainfall. Similarly, a negative trend was identified in resettlement and small-scale communal agricultural land, and is likely the result of increases in urbanization, deforestation and fire frequency; similarly, a negative trend on freehold might be the result of encroacher shrub control. Greening trends across large-scale agriculture on communal land could be indicative of shrub encroachment, agro-forestry and fencing causing decreased grazing intensity. Importantly, no significant trends in woody cover were found across most of the country.

Qualitative high resolution image interpretation allowed the nature of observed land cover changes to be evaluated; in particular, our trend analysis effectively captured direct human impacts such as land clearing. However, greening could not be conclusively identified using available imagery, and is probably the result of indirect impacts. Lastly, trends in woody cover and trends in precipitation are unrelated for most of the study area; their un-coupled relationship supports the validity of using metrics which enhance the distinct phenophases of woody and herbaceous vegetation.

Our results point to a landscape substantially affected by direct human impacts, resulting from the expansion of agriculture and urbanization, but also from indirect impacts, manifesting as long-term gradual vegetation changes. Moreover, distinct

change processes prevails across different biomes. Both instances have important implications for the provision of long-term ecosystem services, and evaluating the response of biomes with large proportion of C4 species to changing atmospheric CO<sub>2</sub> concentrations.

## Acknowledgments

- 5 The authors would like to thank Dr France Gerard for her efforts in the editing of this manuscript and providing valuable insight into the remote sensing aspects.

## 6 References

- Achard, F. 2002. "Determination of Deforestation Rates of the World's Humid Tropical Forests." *Science* 297 (5583): 999–1002. <https://doi.org/10.1126/science.1070656>.
- 10 Adeel, Zafar, Uriel Safriel, David Niemeijer, Robin White, G De Kalbermatten, M Glantz, B Salem, R Scholes, M Niamir-Fuller, and S Ehui. 2005. "Ecosystems and Human Well-Being: Desertification Synthesis." *World Resources Institute, Washington, DC*.
- Ahlström, Anders, Michael R Raupach, Guy Schurgers, Benjamin Smith, Almut Arneth, Martin Jung, Markus Reichstein, Josep G Canadell, Pierre Friedlingstein, and Atul K Jain. 2015. "The Dominant Role of Semi-Arid Ecosystems in the Trend and Variability of the Land CO<sub>2</sub> Sink." *Science* 348 (6237): 895–99.
- 15 Alkama, Ramdane, and Alessandro Cescatti. 2016. "Biophysical Climate Impacts of Recent Changes in Global Forest Cover." *Science* 351 (6273): 600–604.
- Andela, N, YY Liu, AIJM Van Dijk, RAM De Jeu, and TR McVicar. 2013. "Global Changes in Dryland Vegetation Dynamics (1988–2008) Assessed by Satellite Remote Sensing: Comparing a New Passive Microwave Vegetation Density Record with Reflective Greenness Data." *Biogeosciences* 10 (10): 6657.
- 20 Andela, Niels, DC Morton, Louis Giglio, Yang Chen, GR van der Werf, PS Kasibhatla, RS DeFries, GJ Collatz, S Hantson, and Silvia Kloster. 2017. "A Human-Driven Decline in Global Burned Area." *Science* 356 (6345): 1356–62.
- Anderson, Liana Oighstein, Yosio Edemir Shimabukuro, Ruth S Defries, and Douglas Morton. 2005. "Assessment of Deforestation in near Real Time over the Brazilian Amazon Using Multitemporal Fraction Images Derived from Terra MODIS." *IEEE Geoscience and Remote Sensing Letters* 2 (3): 315–18.
- 25 Archibald, S, and RJ Scholes. 2007. "Leaf Green-up in a Semi-Arid African Savanna—Separating Tree and Grass Responses to Environmental Cues." *Journal of Vegetation Science* 18 (4): 583–94.
- Asner, Gregory P, Steve Archer, R Flint Hughes, R James Ansley, and Carol A Wessman. 2003. "Net Changes in Regional Woody Vegetation Cover and Carbon Storage in Texas Drylands, 1937–1999." *Global Change Biology* 9 (3): 316–35.
- 30 Asner, Gregory P., and Kathleen B. Heidebrecht. 2005. "Desertification Alters Regional Ecosystem-Climate Interactions." *Global Change Biology* 11 (1): 182–94. <https://doi.org/10.1111/j.1529-8817.2003.00880.x>.
- Asner, Gregory P, and David B Lobell. 2000. "A Biogeophysical Approach for Automated SWIR Unmixing of Soils and Vegetation." *Remote Sensing of Environment* 74 (1): 99–112. [https://doi.org/10.1016/S0034-4257\(00\)00126-7](https://doi.org/10.1016/S0034-4257(00)00126-7).
- 35 Asrar, GQ, M Fuchs, ET Kanemasu, and JL Hatfield. 1984. "Estimating Absorbed Photosynthetic Radiation and Leaf Area Index from Spectral Reflectance in Wheat." *Agronomy Journal* 76 (2): 300–306.
- Baccini, A, MA Friedl, CE Woodcock, and Z Zhu. 2007. "Scaling Field Data to Calibrate and Validate Moderate Spatial Resolution Remote Sensing Models." *Photogrammetric Engineering & Remote Sensing* 73 (8): 945–54.
- Baccini, A., S. J. Goetz, W. S. Walker, N. T. Laporte, M. Sun, D. Sulla-Menashe, J. Hackler, et al. 2012. "Estimated Carbon Dioxide Emissions from Tropical Deforestation Improved by Carbon-Density Maps." *Nature Clim. Change* 2 (3): 182–85. <https://doi.org/10.1038/nclimate1354>.
- 40

- Badreldin, Nasem, and Arturo Sanchez-Azofeifa. 2015. "Estimating Forest Biomass Dynamics by Integrating Multi-Temporal Landsat Satellite Images with Ground and Airborne LiDAR Data in the Coal Valley Mine, Alberta, Canada." *Remote Sensing* 7 (3): 2832–49. <https://doi.org/10.3390/rs70302832>.
- 5 Bastin, Jean-François, Nora Berrahmouni, Alan Grainger, Danae Maniatis, Danilo Mollicone, Rebecca Moore, Chiara Patriarca, et al. 2017. "The Extent of Forest in Dryland Biomes." *Science* 356 (6338): 635–38. <https://doi.org/10.1126/science.aam6527>.
- Beer, Y. de, W. Kilian, W. Versfeld, and R.J. van Aarde. 2006. "Elephants and Low Rainfall Alter Woody Vegetation in Etosha National Park, Namibia." *Journal of Arid Environments* 64 (3): 412–21. <https://doi.org/10.1016/j.jaridenv.2005.06.015>.
- 10 Bond, Ivan, Muyeye Chambwera, Brian Jones, Monica Chundama, and Isilda Nhantumbo. 2010. *REDD+ in Dryland Forests Issues and Prospects for Pro-Poor REDD in the Miombo Woodlands of Southern Africa*. International Institute for Environment and Development (UK).
- Brandt, Martin, Pierre Hiernaux, Kjeld Rasmussen, Cheikh Mbow, Laurent Kergoat, Torbern Tagesson, Yahaya Z. Ibrahim, Abdoulaye Wélé, Compton J. Tucker, and Rasmus Fensholt. 2016. "Assessing Woody Vegetation Trends in Sahelian Drylands Using MODIS Based Seasonal Metrics." *Remote Sensing of Environment* 183 (September): 215–25. <https://doi.org/10.1016/j.rse.2016.05.027>.
- 15 Brandt, Martin, Pierre Hiernaux, Torbern Tagesson, Aleixandre Verger, Kjeld Rasmussen, Abdoul Aziz Diouf, Cheikh Mbow, Eric Mougin, and Rasmus Fensholt. 2016. "Woody Plant Cover Estimation in Drylands from Earth Observation Based Seasonal Metrics." *Remote Sensing of Environment* 172 (January): 28–38. <https://doi.org/10.1016/j.rse.2015.10.036>.
- 20 Brandt, Martin, Cheikh Mbow, Abdoul A. Diouf, Aleixandre Verger, Cyrus Samimi, and Rasmus Fensholt. 2015. "Ground- and Satellite-Based Evidence of the Biophysical Mechanisms behind the Greening Sahel." *Global Change Biology* 21 (4): 1610–20. <https://doi.org/10.1111/gcb.12807>.
- Brandt, Martin, Kjeld Rasmussen, Josep Peñuelas, Feng Tian, Guy Schurgers, Aleixandre Verger, Ole Mertz, John RB Palmer, and Rasmus Fensholt. 2017. "Human Population Growth Offsets Climate-Driven Increase in Woody Vegetation in Sub-Saharan Africa." *Nature Ecology & Evolution* 1 (4): 0081.
- 25 Breiman, Leo. 2001. "Random Forests." *Machine Learning* 45 (1): 5–32.
- Brink, Andreas Bernhard, and Hugh Douglas Eva. 2009. "Monitoring 25 Years of Land Cover Change Dynamics in Africa: A Sample Based Remote Sensing Approach." *Applied Geography* 29 (4): 501–12. <https://doi.org/10.1016/j.apgeog.2008.10.004>.
- 30 Broich, M., A. Huete, M. G. Tulbure, X. Ma, Q. Xin, M. Paget, N. Restrepo-Coupe, K. Davies, R. Devadas, and A. Held. 2014. "Land Surface Phenological Response to Decadal Climate Variability across Australia Using Satellite Remote Sensing." *Biogeosciences* 11 (18): 5181–98. <https://doi.org/10.5194/bg-11-5181-2014>.
- Buitenwerf, R, WJ Bond, N Stevens, and WSW Trollope. 2012. "Increased Tree Densities in South African Savannas: > 50 Years of Data Suggests CO2 as a Driver." *Global Change Biology* 18 (2): 675–84.
- 35 Chidumayo, E. N. 2001. "Climate and Phenology of Savanna Vegetation in Southern Africa." *Journal of Vegetation Science* 12 (3): 347–54. <https://doi.org/10.2307/3236848>.
- Chidumayo, Emmanuel N. 1997. *Miombo Ecology and Management: An Introduction*. Intermediate Technology Publications Ltd (ITP).
- 40 Chidumayo, Emmanuel N, and Davison J Gumbo. 2010. *The Dry Forests and Woodlands of Africa: Managing for Products and Services*. Earthscan.
- Childes, S. L. 1988. "Phenology of Nine Common Woody Species in Semi-Arid, Deciduous Kalahari Sand Vegetation." *Vegetatio* 79 (3): 151–63. <https://doi.org/10.1007/BF00044907>.
- Colombo, Roberto, Dario Bellingeri, Dante Fasolini, and Carlo M Marino. 2003. "Retrieval of Leaf Area Index in Different Vegetation Types Using High Resolution Satellite Data." *Remote Sensing of Environment* 86 (1): 120–31.
- 45 Curtis, Barbara, and Coleen Mannheimer. 2005. "Tree Atlas of Namibia." *Windhoek: Namibian Botanical Research Institute* 1.
- Cutler, D Richard, Thomas C Edwards, Karen H Beard, Adele Cutler, Kyle T Hess, Jacob Gibson, and Joshua J Lawler. 2007. "Random Forests for Classification in Ecology." *Ecology* 88 (11): 2783–92.

- De Cauwer, Vera, Coert J Geldenhuys, Raf Aerts, Miya Kabajani, and Bart Muys. 2016. "Patterns of Forest Composition and Their Long Term Environmental Drivers in the Tropical Dry Forest Transition Zone of Southern Africa." *Forest Ecosystems* 3 (1): 23.
- De Klerk, JN. 2004a. *Bush Encroachment in Namibia: Report on Phase 1 of the Bush Encroachment Research, Monitoring, and Management Project*. Ministry of Environment and Tourism, Directorate of Environmental Affairs.
- 5 ———. 2004b. *Bush Encroachment in Namibia: Report on Phase 1 of the Bush Encroachment Research, Monitoring, and Management Project*. Ministry of Environment and Tourism, Directorate of Environmental Affairs.
- deBeurs, K.M., and G.M. Henebry. 2004. "Trend Analysis of the Pathfinder AVHRR Land (PAL) NDVI Data for the Deserts of Central Asia." *IEEE Geoscience and Remote Sensing Letters* 1 (4): 282–86.
- 10 <https://doi.org/10.1109/LGRS.2004.834805>.
- Desmet, P.G., and R.M. Cowling. 1999. "Biodiversity, Habitat and Range-Size Aspects of a Flora from a Winter-Rainfall Desert in North-Western Namaqualand, South Africa." *Plant Ecology* 142 (1): 23–33.
- <https://doi.org/10.1023/A:1009814109891>.
- Didan, K. 2015. "MOD13Q1 MODIS/Terra Vegetation Indices 16-Day L3 Global 250 m SIN Grid V006." *NASA EOSDIS Land Processes*.
- 15 Donohue, Randall J, Michael L Roderick, Tim R McVicar, and Graham D Farquhar. 2013. "Impact of CO2 Fertilization on Maximum Foliage Cover across the Globe's Warm, Arid Environments." *Geophysical Research Letters* 40 (12): 3031–35.
- Durant, SM, N Pettorelli, S Bashir, R Woodroffe, T Wachter, P De Ornellas, C Ransom, T Abáigar, M Abdelgadir, and H El Alqamy. 2012. "Forgotten Biodiversity in Desert Ecosystems." *Science* 336 (6087): 1379–80.
- 20 Duveiller, Gregory, Josh Hooker, and Alessandro Cescatti. 2018. "The Mark of Vegetation Change on Earth's Surface Energy Balance." *Nature Communications* 9 (1): 679.
- Eastman, J.R. 2009. "IDRISI Selva (Worcester, MA: Clark University)."
- Eklundh, Lars, and Lennart Olsson. 2003. "Vegetation Index Trends for the African Sahel 1982-1999: NDVI TRENDS OVER THE SAHEL 1982-1999." *Geophysical Research Letters* 30 (8). <https://doi.org/10.1029/2002GL016772>.
- 25 Eldridge, David J., Matthew A. Bowker, Fernando T. Maestre, Erin Roger, James F. Reynolds, and Walter G. Whitford. 2011. "Impacts of Shrub Encroachment on Ecosystem Structure and Functioning: Towards a Global Synthesis: Synthesizing Shrub Encroachment Effects." *Ecology Letters* 14 (7): 709–22. <https://doi.org/10.1111/j.1461-0248.2011.01630.x>.
- 30 Erkkilä, A. 2001. *Living on the Land: Change in Forest Cover in North Central Namibia 1943–1996*. Vol. 37. Silva Carelica.
- Fensholt, Rasmus, Tobias Langanke, Kjeld Rasmussen, Anette Reenberg, Stephen D. Prince, Compton Tucker, Robert J. Scholes, et al. 2012. "Greenness in Semi-Arid Areas across the Globe 1981–2007 — an Earth Observing Satellite Based Analysis of Trends and Drivers." *Remote Sensing of Environment* 121 (June): 144–58.
- 35 <https://doi.org/10.1016/j.rse.2012.01.017>.
- Foley, J. A. 2005. "Global Consequences of Land Use." *Science* 309 (5734): 570–74. <https://doi.org/10.1126/science.1111772>.
- Forkel, Matthias, Nuno Carvalhais, Jan Verbesselt, Miguel Mahecha, Christopher Neigh, and Markus Reichstein. 2013. "Trend Change Detection in NDVI Time Series: Effects of Inter-Annual Variability and Methodology." *Remote Sensing* 5 (5): 2113–44. <https://doi.org/10.3390/rs5052113>.
- 40 Friedl, M, GM Henebry, B Reed, and A Huete. 2006. "Land Surface Phenology NASA White Paper." *NASA Documents* 15: 2011.
- Frost, Peter. 1996. "The Ecology of Miombo Woodlands." *The Miombo in Transition: Woodlands and Welfare in Africa*, 11–57.
- 45 Gessner, Ursula, Miriam Machwitz, Christopher Conrad, and Stefan Dech. 2013. "Estimating the Fractional Cover of Growth Forms and Bare Surface in Savannas. A Multi-Resolution Approach Based on Regression Tree Ensembles." *Remote Sensing of Environment* 129 (February): 90–102. <https://doi.org/10.1016/j.rse.2012.10.026>.
- Guay, Kevin C, Pieter SA Beck, Logan T Berner, Scott J Goetz, Alessandro Baccini, and Wolfgang Buermann. 2014. "Vegetation Productivity Patterns at High Northern Latitudes: A Multi- sensor Satellite Data Assessment." *Global Change Biology* 20 (10): 3147–58.
- 50

- Hammer, Dan, Robin Kraft, and David Wheeler. 2014. "Alerts of Forest Disturbance from MODIS Imagery." *International Journal of Applied Earth Observation and Geoinformation* 33: 1–9.
- Hansen, M. C., P. V. Potapov, R. Moore, M. Hancher, S. A. Turubanova, A. Tyukavina, D. Thau, et al. 2013a. "High-Resolution Global Maps of 21st-Century Forest Cover Change." *Science* 342 (6160): 850–53. <https://doi.org/10.1126/science.1244693>.
- 5 ———. 2013b. "High-Resolution Global Maps of 21st-Century Forest Cover Change." *Science* 342 (6160): 850–53. <https://doi.org/10.1126/science.1244693>.
- Hansen, Matthew C., and Thomas R. Loveland. 2012. "A Review of Large Area Monitoring of Land Cover Change Using Landsat Data." *Remote Sensing of Environment* 122 (July): 66–74. <https://doi.org/10.1016/j.rse.2011.08.024>.
- 10 Hansen, Matthew C., Peter V. Potapov, Scott J. Goetz, Svetlana Turubanova, Alexandra Tyukavina, Alexander Krylov, Anil Kommareddy, and Alexey Egorov. 2016. "Mapping Tree Height Distributions in Sub-Saharan Africa Using Landsat 7 and 8 Data." *Remote Sensing of Environment* 185 (November): 221–32. <https://doi.org/10.1016/j.rse.2016.02.023>.
- Hansen, M.C, R.S DeFries, J.R.G Townshend, R Sohlberg, C Dimiceli, and M Carroll. 2002. "Towards an Operational MODIS Continuous Field of Percent Tree Cover Algorithm: Examples Using AVHRR and MODIS Data." *Remote Sensing of Environment* 83 (1–2): 303–19. [https://doi.org/10.1016/S0034-4257\(02\)00079-2](https://doi.org/10.1016/S0034-4257(02)00079-2).
- 15 Helman, David, Itamar Lensky, Naama Tessler, and Yagil Osem. 2015. "A Phenology-Based Method for Monitoring Woody and Herbaceous Vegetation in Mediterranean Forests from NDVI Time Series." *Remote Sensing* 7 (9): 12314–35. <https://doi.org/10.3390/rs70912314>.
- 20 Herrick, J. E., K. C. Urama, J. W. Karl, J. Boos, M.-V. V. Johnson, K. D. Shepherd, J. Hempel, et al. 2013. "The Global Land-Potential Knowledge System (LandPKS): Supporting Evidence-Based, Site-Specific Land Use and Management through Cloud Computing, Mobile Applications, and Crowdsourcing." *Journal of Soil and Water Conservation* 68 (1): 5A-12A. <https://doi.org/10.2489/jswc.68.1.5A>.
- Herrick, Jeffrey E, Veronica C Lessard, Kenneth E Spaeth, Patrick L Shaver, Robert S Dayton, David A Pyke, Leonard Jolley, and J Jeffery Goebel. 2010. "National Ecosystem Assessments Supported by Scientific and Local Knowledge." *Frontiers in Ecology and the Environment* 8 (8): 403–8. <https://doi.org/10.1890/100017>.
- 25 Herrmann, Stefanie M., Assaf Anyamba, and Compton J. Tucker. 2005. "Recent Trends in Vegetation Dynamics in the African Sahel and Their Relationship to Climate." *Global Environmental Change* 15 (4): 394–404. <https://doi.org/10.1016/j.gloenvcha.2005.08.004>.
- 30 Herrmann, Stefanie M, and G Gray Tappan. 2013. "Vegetation Impoverishment despite Greening: A Case Study from Central Senegal." *Journal of Arid Environments* 90: 55–66.
- Hoaglin, David C, Frederick Mosteller, and John Wilder Tukey. 1983. *Understanding Robust and Exploratory Data Analysis*. Vol. 3. Wiley New York.
- Horion, Stéphanie, Rasmus Fensholt, Torbern Tagesson, and Andrea Ehammer. 2014. "Using Earth Observation-Based Dry Season NDVI Trends for Assessment of Changes in Tree Cover in the Sahel." *International Journal of Remote Sensing* 35 (7): 2493–2515. <https://doi.org/10.1080/01431161.2014.883104>.
- 35 Hüttich, Christian, Ursula Gessner, Martin Herold, Ben J. Strohbach, Michael Schmidt, Manfred Keil, and Stefan Dech. 2009. "On the Suitability of MODIS Time Series Metrics to Map Vegetation Types in Dry Savanna Ecosystems: A Case Study in the Kalahari of NE Namibia." *Remote Sensing* 1 (4): 620–43. <https://doi.org/10.3390/rs1040620>.
- 40 Jacquin, Anne, David Sheeren, and Jean-Paul Lacombe. 2010. "Vegetation Cover Degradation Assessment in Madagascar Savanna Based on Trend Analysis of MODIS NDVI Time Series." *International Journal of Applied Earth Observation and Geoinformation* 12 (February): S3–10. <https://doi.org/10.1016/j.jag.2009.11.004>.
- John Mendelsohn, and Selma el Obeid. 2002a. *The Communal Lands in Eastern Namibia*. Research and Information Services Namibia.
- 45 ———. 2002b. *The Communal Lands in Eastern Namibia*. Research and Information Services Namibia.
- Jönsson, Per, and Lars Eklundh. 2004. "TIMESAT—a Program for Analyzing Time-Series of Satellite Sensor Data." *Computers & Geosciences* 30 (8): 833–45.
- Joyce, Robert J., John E. Janowiak, Phillip A. Arkin, and Pingping Xie. 2004. "CMORPH: A Method That Produces Global Precipitation Estimates from Passive Microwave and Infrared Data at High Spatial and Temporal Resolution."

- Kuenzer, Claudia, Stefan Dech, and Wolfgang Wagner, eds. 2015. *Remote Sensing Time Series*. Vol. 22. Remote Sensing and Digital Image Processing. Cham: Springer International Publishing. <http://link.springer.com/10.1007/978-3-319-15967-6>.
- 5 Le Quéré, Corinne, Robbie M Andrew, Pierre Friedlingstein, Stephen Sitch, Julia Pongratz, Andrew C Manning, Jan Ivar Korsbakken, Glen P Peters, Josep G Canadell, and Robert B Jackson. 2017. “Global Carbon Budget 2017.” *Earth System Science Data Discussions*, 1–79.
- Liu, Yi Y, Albert IJM Van Dijk, Richard AM De Jeu, Josep G Canadell, Matthew F McCabe, Jason P Evans, and Guojie Wang. 2015. “Recent Reversal in Loss of Global Terrestrial Biomass.” *Nature Climate Change* 5 (5): 470–74.
- 10 Lloyd, Christopher T, Alessandro Sorichetta, and Andrew J Tatem. 2017. “High Resolution Global Gridded Data for Use in Population Studies.” *Scientific Data* 4: 170001.
- Maestre, Fernando T, Matthew A Bowker, María D Puche, M Belén Hinojosa, Isabel Martínez, Pablo García- Palacios, Andrea P Castillo, Santiago Soliveres, Arántzazu L Luzuriaga, and Ana M Sánchez. 2009. “Shrub Encroachment Can Reverse Desertification in Semi- arid Mediterranean Grasslands.” *Ecology Letters* 12 (9): 930–41.
- 15 Mendelsohn, J, Jarvis, A, Roberts, C, and Robertson, T. 2002. *Atlas of Namibia: A Portrait of the Land and Its People*. David Philip Publishers: Cape Town.
- Mendelsohn, John, and Selma el Obeid. 2005a. *Forests and Woodlands of Namibia*. Research and Information Services Namibia.
- 20 ———. 2005b. *Forests and Woodlands of Namibia*. Research and Information Services Namibia.
- . 2005c. *Forests and Woodlands of Namibia*. Research and Information Services Namibia.
- “Ministry of Agriculture, Water and Forestry. 2017. Monthly Burned Area Report, August 2017.” 2017. Ministry of Agriculture, Water and Forestry.
- Moisen, Gretchen G, and Tracey S Frescino. 2002. “Comparing Five Modelling Techniques for Predicting Forest Characteristics.” *Ecological Modelling* 157 (2): 209–25.
- 25 Murphy, Brett P, and David MJS Bowman. 2012. “What Controls the Distribution of Tropical Forest and Savanna?” *Ecology Letters* 15 (7): 748–58.
- Myneni, Ranga B, Forrest G Hall, Piers J Sellers, and Alexander L Marshak. 1995. “The Interpretation of Spectral Vegetation Indexes.” *IEEE Transactions on Geoscience and Remote Sensing* 33 (2): 481–86.
- 30 Myneni, Ranga B, CD Keeling, Compton J Tucker, Ghassem Asrar, and Ramakrishna R Nemani. 1997. “Increased Plant Growth in the Northern High Latitudes from 1981 to 1991.” *Nature* 386 (6626): 698.
- Nicholson, Sharon E, and Dara Entekhabi. 1987. “Rainfall Variability in Equatorial and Southern Africa: Relationships with Sea Surface Temperatures along the Southwestern Coast of Africa.” *Journal of Climate and Applied Meteorology* 26 (5): 561–78.
- 35 Nicholson, Sharon E, Compton J Tucker, and MB Ba. 1998. “Desertification, Drought, and Surface Vegetation: An Example from the West African Sahel.” *Bulletin of the American Meteorological Society* 79 (5): 815–29.
- O’Connor, Tim G, James R Puttick, and M Timm Hoffman. 2014. “Bush Encroachment in Southern Africa: Changes and Causes.” *African Journal of Range & Forage Science* 31 (2): 67–88. <https://doi.org/10.2989/10220119.2014.939996>.
- 40 Parr, Catherine L, Caroline ER Lehmann, William J Bond, William A Hoffmann, and Alan N Andersen. 2014. “Tropical Grassy Biomes: Misunderstood, Neglected, and under Threat.” *Trends in Ecology & Evolution* 29 (4): 205–13.
- Pettorelli, Nathalie, Jon Olav Vik, Atle Myrsterud, Jean-Michel Gaillard, Compton J Tucker, and Nils Chr Stenseth. 2005. “Using the Satellite-Derived NDVI to Assess Ecological Responses to Environmental Change.” *Trends in Ecology & Evolution* 20 (9): 503–10.
- 45 Poulter, Benjamin, David Frank, Philippe Ciais, Ranga B Myneni, Niels Andela, Jian Bi, Gregoire Broquet, Josep G Canadell, Frederic Chevallier, and Yi Y Liu. 2014. “Contribution of Semi-Arid Ecosystems to Interannual Variability of the Global Carbon Cycle.” *Nature* 509 (7502): 600–603.
- Prasad, Anantha M, Louis R Iverson, and Andy Liaw. 2006. “Newer Classification and Regression Tree Techniques: Bagging and Random Forests for Ecological Prediction.” *Ecosystems* 9 (2): 181–99.



- Prince, SD. 1991. "Satellite Remote Sensing of Primary Production: Comparison of Results for Sahelian Grasslands 1981-1988." *International Journal of Remote Sensing* 12 (6): 1301-11.
- Pröpper, M, Alexander Gröngroft, T Falk, Annette Eschenbach, T Fox, U Gessner, J Hecht, MO Hinz, and C Huettich. 2010. "Causes and Perspectives of Land-Cover Change through Expanding Cultivation in Kavango."
- 5 Reynolds, J. F., D. M. S. Smith, E. F. Lambin, B. L. Turner, M. Mortimore, S. P. J. Batterbury, T. E. Downing, et al. 2007. "Global Desertification: Building a Science for Dryland Development." *Science* 316 (5826): 847-51. <https://doi.org/10.1126/science.1131634>.
- Röder, Achim, Michael Pröpper, Marion Stellmes, Anne Schneibel, and Joachim Hill. 2015. "Assessing Urban Growth and Rural Land Use Transformations in a Cross-Border Situation in Northern Namibia and Southern Angola." *Land Use*
- 10 *Policy* 42 (January): 340-54. <https://doi.org/10.1016/j.landusepol.2014.08.008>.
- Roderick, Michael L, Ian R Noble, and Shane W Cridland. 1999. "Estimating Woody and Herbaceous Vegetation Cover from Time Series Satellite Observations." *Global Ecology and Biogeography* 8 (6): 501-8.
- Rohde, Richard F, and M Timm Hoffman. 2012. "The Historical Ecology of Namibian Rangelands: Vegetation Change since 1876 in Response to Local and Global Drivers." *Science of the Total Environment* 416: 276-88.
- 15 Ryan, Casey M., Timothy Hill, Emily Woollen, Claire Ghee, Edward Mitchard, Gemma Cassells, John Grace, Iain H. Woodhouse, and Mathew Williams. 2012a. "Quantifying Small-Scale Deforestation and Forest Degradation in African Woodlands Using Radar Imagery." *Global Change Biology* 18 (1): 243-57. <https://doi.org/10.1111/j.1365-2486.2011.02551.x>.
- . 2012b. "Quantifying Small-Scale Deforestation and Forest Degradation in African Woodlands Using Radar
- 20 Imagery." *Global Change Biology* 18 (1): 243-57. <https://doi.org/10.1111/j.1365-2486.2011.02551.x>.
- Ryan, Casey M., Mathew Williams, John Grace, Emily Woollen, and Caroline E. R. Lehmann. 2017. "Pre-Rain Green-up Is Ubiquitous across Southern Tropical Africa: Implications for Temporal Niche Separation and Model Representation." *New Phytologist* 213 (2): 625-33. <https://doi.org/10.1111/nph.14262>.
- Saha, MV, TM Scanlon, and P D'odorico. 2015. "Examining the Linkage between Shrub Encroachment and Recent
- 25 Greening in Water- limited Southern Africa." *Ecosphere* 6 (9): 1-16.
- Sánchez- Azofeifa, G Arturo, Mauricio Quesada, Jon Paul Rodriguez, Jafet M Nassar, Kathryn E Stoner, Alicia Castillo, Theresa Garvin, Egleé L Zent, Julio C Calvo- Alvarado, and Margaret ER Kalacska. 2005. "Research Priorities for Neotropical Dry Forests." *Biotropica* 37 (4): 477-85.
- Sankaran, Mahesh, Niall P. Hanan, Robert J. Scholes, Jayashree Ratnam, David J. Augustine, Brian S. Cade, Jacques
- 30 Gignoux, et al. 2005. "Determinants of Woody Cover in African Savannas." *Nature* 438 (7069): 846-49. <https://doi.org/10.1038/nature04070>.
- Sankaran, Mahesh, Jayashree Ratnam, and Niall Hanan. 2008. "Woody Cover in African Savannas: The Role of Resources, Fire and Herbivory." *Global Ecology and Biogeography* 17 (2): 236-45.
- Schneibel, A, M Stellmes, R Revermann, M Finckh, A Röder, and J Hill. 2013. "Agricultural Expansion during the Post-
- 35 Civil War Period in Southern Angola Based on Bi-Temporal Landsat Data." *Biodiversity Ecol* 5: 311.
- Schneibel, Anne, Marion Stellmes, Achim Röder, David Frantz, Benjamin Kowalski, Erik Haß, and Joachim Hill. 2017. "Assessment of Spatio-Temporal Changes of Smallholder Cultivation Patterns in the Angolan Miombo Belt Using Segmentation of Landsat Time Series." *Remote Sensing of Environment* 195: 118-29.
- Scholes, R. J., and S. R. Archer. 1997. "Tree-Grass Interactions in Savannas." *Annual Review of Ecology and Systematics*
- 40 28: 517-44.
- Sellers, PJ, JA Berry, GJ Collatz, CB Field, and FG Hall. 1992. "Canopy Reflectance, Photosynthesis, and Transpiration. III. A Reanalysis Using Improved Leaf Models and a New Canopy Integration Scheme." *Remote Sensing of Environment* 42 (3): 187-216.
- Sexton, Joseph O, Praveen Noojipady, Xiao-Peng Song, Min Feng, Dan-Xia Song, Do-Hyung Kim, Anupam Anand,
- 45 Chengquan Huang, Saurabh Channan, and Stuart L Pimm. 2016. "Conservation Policy and the Measurement of Forests." *Nature Climate Change* 6 (2): 192.
- Sexton, Joseph O, Xiao-Peng Song, Min Feng, Praveen Noojipady, Anupam Anand, Chengquan Huang, Do-Hyung Kim, Kathrine M Collins, Saurabh Channan, and Charlene DiMiceli. 2013. "Global, 30-m Resolution Continuous Fields of Tree Cover: Landsat-Based Rescaling of MODIS Vegetation Continuous Fields with Lidar-Based Estimates of
- 50 Error." *International Journal of Digital Earth* 6 (5): 427-48.

- Simons, Henk, Xinia Soto, Zhiliang Zhu, Karn D Singh, Marie-France Bellan, Susan Iremonger, Harry Hirvonen, Brad Smith, Vicente Watson, and Joseph Tosi. 2001. "Global Ecological Zoning for the Global Forest Resources Assessment 2000-Final Report."
- Soliveres, Santiago, and David J Eldridge. 2014. "Do Changes in Grazing Pressure and the Degree of Shrub Encroachment Alter the Effects of Individual Shrubs on Understorey Plant Communities and Soil Function?" *Functional Ecology* 28 (2): 530–37.
- Song, Xiao-Peng, Matthew C Hansen, Stephen V Stehman, Peter V Potapov, Alexandra Tyukavina, Eric F Vermote, and John R Townshend. 2018. "Global Land Change from 1982 to 2016." *Nature*, 1.
- Stehman, Stephen V, Pontus Olofsson, Curtis E Woodcock, Martin Herold, and Mark A Friedl. 2012. "A Global Land-Cover Validation Data Set, II: Augmenting a Stratified Sampling Design to Estimate Accuracy by Region and Land-Cover Class." *International Journal of Remote Sensing* 33 (22): 6975–93.
- Sulkava, Mika, Sebastiaan Luyssaert, Pasi Rautio, Ivan A. Janssens, and Jaakko Hollmén. 2007. "Modeling the Effects of Varying Data Quality on Trend Detection in Environmental Monitoring." *Ecological Informatics* 2 (2): 167–76. <https://doi.org/10.1016/j.ecoinf.2007.03.008>.
- Tian, Feng, Martin Brandt, Yi Y. Liu, Kjeld Rasmussen, and Rasmus Fensholt. 2016. "Mapping Gains and Losses in Woody Vegetation across Global Tropical Drylands." *Global Change Biology*, September. <https://doi.org/10.1111/gcb.13464>.
- Turner, B. L., E. F. Lambin, and A. Reenberg. 2007. "The Emergence of Land Change Science for Global Environmental Change and Sustainability." *Proceedings of the National Academy of Sciences* 104 (52): 20666–71. <https://doi.org/10.1073/pnas.0704119104>.
- Verlinden, Alex, and Risto Laamanen. 2006a. "Long Term Fire Scar Monitoring with Remote Sensing in Northern Namibia: Relations Between Fire Frequency, Rainfall, Land Cover, Fire Management and Trees." *Environmental Monitoring and Assessment* 112 (1–3): 231–53. <https://doi.org/10.1007/s10661-006-1705-1>.
- . 2006b. "Modeling Woody Vegetation Resources Using Landsat TM Imagery in Northern Namibia." *The Southern African Forestry Journal* 207 (1): 27–39. <https://doi.org/10.2989/10295920609505250>.
- Wagenseil, Hendrik, and Cyrus Samimi. 2007. "Woody Vegetation Cover in Namibian Savannas: A Modelling Approach Based on Remote Sensing." *Erdkunde* 61 (4): 325–34. <https://doi.org/10.3112/erdkunde.2007.04.03>.
- Ward, D. 2005. "Do We Understand the Causes of Bush Encroachment in African Savannas?" *African Journal of Range & Forage Science* 22 (2): 101–5. <https://doi.org/10.2989/10220110509485867>.
- Williams, MRCM, CM Ryan, RM Rees, E Sambane, J Fernando, and J Grace. 2008. "Carbon Sequestration and Biodiversity of Re-Growing Miombo Woodlands in Mozambique." *Forest Ecology and Management* 254 (2): 145–55.
- Willmott, Cort J. 1982. "Some Comments on the Evaluation of Model Performance." *Bulletin of the American Meteorological Society* 63 (11): 1309–13.
- Wingate, Vladimir, Stuart Phinn, Nikolaus Kuhn, Lena Bloemertz, and Kiran Dhanjal-Adams. 2016. "Mapping Decadal Land Cover Changes in the Woodlands of North Eastern Namibia from 1975 to 2014 Using the Landsat Satellite Archived Data." *Remote Sensing* 8 (8): 681. <https://doi.org/10.3390/rs8080681>.
- Wingate, Vladimir R., Stuart R Phinn, Nikolaus Kuhn, and Peter Scarth. 2018. "Estimating Aboveground Woody Biomass Change in Kalahari Woodland: Combining Field, Radar, and Optical Data Sets." *International Journal of Remote Sensing* 39 (2): 577–606. <https://doi.org/10.1080/01431161.2017.1390271>.
- Zandler, H., A. Brenning, and C. Samimi. 2015. "Quantifying Dwarf Shrub Biomass in an Arid Environment: Comparing Empirical Methods in a High Dimensional Setting." *Remote Sensing of Environment* 158 (March): 140–55. <https://doi.org/10.1016/j.rse.2014.11.007>.
- Zhang, Xiaoyang, Mark A. Friedl, Crystal B. Schaaf, Alan H. Strahler, John C.F. Hodges, Feng Gao, Bradley C. Reed, and Alfredo Huete. 2003. "Monitoring Vegetation Phenology Using MODIS." *Remote Sensing of Environment* 84 (3): 471–75. [https://doi.org/10.1016/S0034-4257\(02\)00135-9](https://doi.org/10.1016/S0034-4257(02)00135-9).
- Zhang, Xiaoyang, Mark A Friedl, Crystal B Schaaf, Alan H Strahler, and Zhong Liu. 2005. "Monitoring the Response of Vegetation Phenology to Precipitation in Africa by Coupling MODIS and TRMM Instruments." *Journal of Geophysical Research: Atmospheres* 110 (D12).

- Zhu, Likai, and Jane Southworth. 2013. "Disentangling the Relationships between Net Primary Production and Precipitation in Southern Africa Savannas Using Satellite Observations from 1982 to 2010." *Remote Sensing* 5 (8): 3803–25. <https://doi.org/10.3390/rs5083803>.
- 5     Zhu, Zaichun, Shilong Piao, Ranga B Myneni, Mengtian Huang, Zhenzhong Zeng, Josep G Canadell, Philippe Ciais, Stephen Sitch, Pierre Friedlingstein, and Almut Arneth. 2016. "Greening of the Earth and Its Drivers." *Nature Climate Change* 6 (8): 791–95.
